# Supplementary material for: Electrostatic repulsion-controlled regioselectivity in nitrene-mediated allylic C–H amidations
Source: Royal Society of Chemistry journal article supplement (doi:10.1039/d1qo01018b), 2021-01-01
Supplement: d1qo01018b1.pdf [file d1qo01018b1.pdf]

## **Electrostatic repulsion-controlled regioselectivity in nitrene-mediated allylic C-H amidations**

Fang Huang,<sup>\*a</sup> Xiaoxiao Tian,<sup>a</sup> Fangao Hou,<sup>a</sup> Yaping Xu,<sup>a</sup> and Gang Lu<sup>\*b</sup>

<sup>a</sup> College of Chemistry, Chemical Engineering and Materials Science, Shandong Normal University, Jinan, Shandong 250014, China

<sup>b</sup> School of Chemistry and Chemical Engineering, Key Laboratory of Colloid and Interface Chemistry, Ministry of Education, Shandong University, Jinan, Shandong 250100, China

Corresponding Author: [fanghuang@sdu.edu.cn](mailto:fanghuang@sdu.edu.cn); [ganglu@sdu.edu.cn](mailto:ganglu@sdu.edu.cn)

### **Table of Contents**

|                                                                                 |     |
|---------------------------------------------------------------------------------|-----|
| <b>EDA Results along IRC</b> .....                                              | S2  |
| <b>Cartesian Coordinates (Å) and Energies of the Optimized Structures</b> ..... | S14 |

## EDA Results along IRC

The EDA results along IRC for the regioselectivity-determining nitrene insertion step are shown in Tables S1-S16 and Fig. S1-S7. As described in the bar charts of the main text, the difference of electrostatic interactions between the two regioselective transition states is the decisive factor for the b/l selectivity.

**Table S1. EDA energy terms of TS3a along IRC**

| Energy terms<br>(in kcal/mol)<br>TS3a<br>$r(\text{C-N})$ (in Å) | $\Delta E_{\text{dist}}$ | $\Delta E_{\text{Pauli}}$ | $\Delta E_{\text{elstat}}$ | $\Delta E_{\text{pol}}$ | $\Delta E_{\text{ct}}$ | $\Delta E_{\text{disp}}$ |
|-----------------------------------------------------------------|--------------------------|---------------------------|----------------------------|-------------------------|------------------------|--------------------------|
| 2.50                                                            | 3.43                     | 360.13                    | -151.67                    | -147.15                 | -117.22                | -13.81                   |
| 2.45                                                            | 3.28                     | 360.40                    | -150.72                    | -147.33                 | -116.37                | -14.53                   |
| 2.40                                                            | 3.32                     | 360.94                    | -150.07                    | -147.22                 | -115.93                | -15.34                   |
| 2.35                                                            | 3.45                     | 361.52                    | -150.00                    | -147.07                 | -115.98                | -15.78                   |
| 2.30 (TS)                                                       | 3.94                     | 363.74                    | -150.58                    | -146.95                 | -116.73                | -16.54                   |
| 2.24                                                            | 4.66                     | 367.13                    | -151.97                    | -147.12                 | -118.16                | -17.19                   |
| 2.23                                                            | 4.90                     | 368.26                    | -153.71                    | -147.63                 | -118.66                | -17.35                   |
| 2.20                                                            | 5.46                     | 371.08                    | -156.32                    | -147.95                 | -119.87                | -17.66                   |
| 2.16                                                            | 6.49                     | 376.04                    | -159.89                    | -148.49                 | -122.23                | -18.16                   |
| 2.10                                                            | 7.74                     | 382.49                    | -151.67                    | -147.15                 | -125.29                | -18.66                   |

**Table S2. EDA energy terms of TS4a along IRC**

| Energy terms<br>(in kcal/mol)<br>TS4a<br>$r(\text{C-N})$ (in Å) | $\Delta E_{\text{dist}}$ | $\Delta E_{\text{Pauli}}$ | $\Delta E_{\text{elstat}}$ | $\Delta E_{\text{pol}}$ | $\Delta E_{\text{ct}}$ | $\Delta E_{\text{disp}}$ |
|-----------------------------------------------------------------|--------------------------|---------------------------|----------------------------|-------------------------|------------------------|--------------------------|
| 2.50                                                            | 3.57                     | 345.93                    | -143.44                    | -142.34                 | -117.11                | -12.78                   |
| 2.45                                                            | 3.09                     | 346.03                    | -141.71                    | -142.61                 | -115.70                | -13.61                   |
| 2.40                                                            | 2.97                     | 347.44                    | -141.37                    | -142.97                 | -115.26                | -14.26                   |
| 2.35                                                            | 3.10                     | 350.54                    | -141.78                    | -143.56                 | -115.39                | -15.13                   |
| 2.30                                                            | 3.47                     | 353.95                    | -142.81                    | -143.99                 | -116.13                | -15.84                   |
| 2.25                                                            | 4.12                     | 358.47                    | -144.56                    | -144.50                 | -117.51                | -16.59                   |
| 2.22                                                            | 4.57                     | 361.21                    | -145.76                    | -144.81                 | -118.48                | -16.97                   |
| 2.21 (TS)                                                       | 4.82                     | 362.74                    | -146.47                    | -144.97                 | -119.04                | -17.16                   |
| 2.15                                                            | 6.02                     | 369.62                    | -149.93                    | -145.71                 | -121.75                | -17.94                   |
| 2.10                                                            | 7.13                     | 375.78                    | -153.34                    | -146.31                 | -124.34                | -18.54                   |

**Table S3. EDA energy terms of TS3a1 along IRC**

| Energy terms<br>(in kcal/mol)<br><b>TS3a1</b><br>$r(\text{C-N})$ (in Å) | $\Delta E_{\text{dist}}$ | $\Delta E_{\text{Pauli}}$ | $\Delta E_{\text{elstat}}$ | $\Delta E_{\text{pol}}$ | $\Delta E_{\text{ct}}$ | $\Delta E_{\text{disp}}$ |
|-------------------------------------------------------------------------|--------------------------|---------------------------|----------------------------|-------------------------|------------------------|--------------------------|
| 2.50                                                                    | 8.89                     | 305.01                    | -134.28                    | -124.50                 | -91.47                 | -13.70                   |
| 2.45                                                                    | 8.68                     | 304.57                    | -133.04                    | -124.20                 | -91.05                 | -14.46                   |
| 2.40                                                                    | 8.59                     | 304.58                    | -131.93                    | -123.83                 | -90.97                 | -15.41                   |
| 2.35                                                                    | 8.68                     | 305.10                    | -131.45                    | -123.55                 | -91.29                 | -16.12                   |
| 2.30 (TS)                                                               | 8.99                     | 306.38                    | -131.46                    | -123.21                 | -92.15                 | -16.90                   |
| 2.25                                                                    | 9.52                     | 308.66                    | -132.02                    | -122.96                 | -93.60                 | -17.72                   |
| 2.20                                                                    | 10.42                    | 312.68                    | -133.47                    | -123.07                 | -95.99                 | -18.56                   |
| 2.16                                                                    | 11.01                    | 315.19                    | -134.68                    | -122.95                 | -97.57                 | -19.03                   |
| 2.13                                                                    | 11.72                    | 318.25                    | -136.24                    | -122.89                 | -99.43                 | -19.50                   |
| 2.09                                                                    | 12.52                    | 321.93                    | -138.20                    | -122.92                 | -101.58                | -20.00                   |

**Table S4. EDA energy terms of TS4a1 along IRC**

| Energy terms<br>(in kcal/mol)<br><b>TS4a1</b><br>$r(\text{C-N})$ (in Å) | $\Delta E_{\text{dist}}$ | $\Delta E_{\text{Pauli}}$ | $\Delta E_{\text{elstat}}$ | $\Delta E_{\text{pol}}$ | $\Delta E_{\text{ct}}$ | $\Delta E_{\text{disp}}$ |
|-------------------------------------------------------------------------|--------------------------|---------------------------|----------------------------|-------------------------|------------------------|--------------------------|
| 2.50                                                                    | 8.75                     | 293.42                    | -127.27                    | -121.69                 | -90.00                 | -12.28                   |
| 2.45                                                                    | 8.51                     | 293.09                    | -125.98                    | -121.35                 | -89.56                 | -13.02                   |
| 2.40                                                                    | 8.80                     | 294.53                    | -125.49                    | -121.33                 | -89.77                 | -13.94                   |
| 2.35                                                                    | 8.64                     | 296.31                    | -125.65                    | -121.47                 | -90.30                 | -14.57                   |
| 2.30                                                                    | 9.01                     | 299.77                    | -126.46                    | -121.77                 | -91.56                 | -15.49                   |
| 2.26                                                                    | 9.46                     | 303.14                    | -127.56                    | -122.05                 | -92.98                 | -16.21                   |
| 2.23 (TS)                                                               | 9.85                     | 305.79                    | -128.56                    | -122.23                 | -94.19                 | -16.71                   |
| 2.20                                                                    | 10.30                    | 308.68                    | -129.74                    | -122.42                 | -95.56                 | -17.21                   |
| 2.15                                                                    | 11.47                    | 315.42                    | -132.90                    | -122.76                 | -98.99                 | -18.23                   |
| 2.10                                                                    | 12.55                    | 321.35                    | -136.01                    | -123.03                 | -102.12                | -19.01                   |

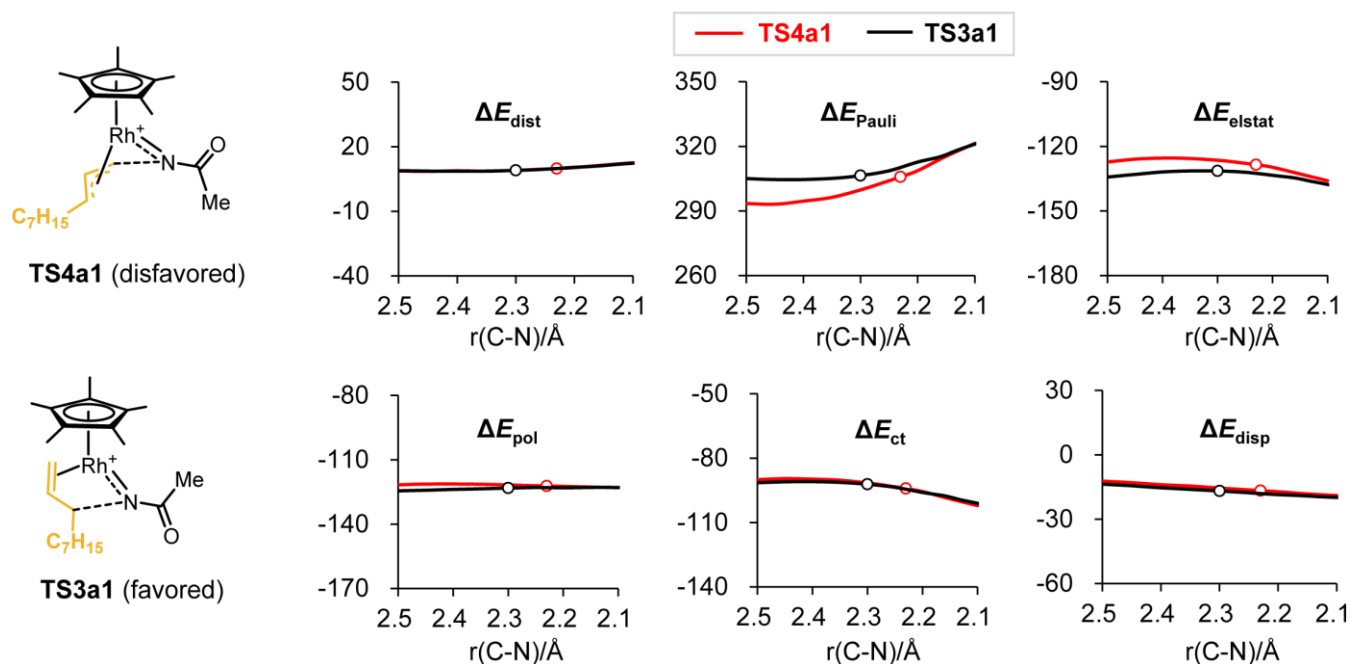

**Fig. S1** EDA results along IRC of Rh=N insertion (**TS3a1** vs **TS4a1**). Energies are shown in kcal/mol.

**Table S5.** EDA energy terms of TS3b along IRC

| Energy terms<br>(in kcal/mol) | $\Delta E_{\text{dist}}$ | $\Delta E_{\text{Pauli}}$ | $\Delta E_{\text{elstat}}$ | $\Delta E_{\text{pol}}$ | $\Delta E_{\text{ct}}$ | $\Delta E_{\text{disp}}$ |
|-------------------------------|--------------------------|---------------------------|----------------------------|-------------------------|------------------------|--------------------------|
| <b>TS3b</b>                   |                          |                           |                            |                         |                        |                          |
| $r(\text{C-N})$ (in Å)        |                          |                           |                            |                         |                        |                          |
| 2.50                          | 10.42                    | 323.98                    | -137.10                    | -133.81                 | -102.32                | -13.14                   |
| 2.46                          | 10.45                    | 324.91                    | -136.91                    | -133.94                 | -102.37                | -13.59                   |
| 2.40                          | 10.63                    | 331.31                    | -138.26                    | -134.93                 | -103.92                | -15.02                   |
| 2.37                          | 10.81                    | 329.70                    | -137.91                    | -134.53                 | -103.70                | -14.78                   |
| 2.34 (TS)                     | 11.03                    | 331.89                    | -138.64                    | -134.81                 | -104.48                | -15.15                   |
| 2.31                          | 11.36                    | 334.66                    | -139.65                    | -135.19                 | -105.52                | -15.54                   |
| 2.24                          | 12.35                    | 341.07                    | -142.81                    | -135.11                 | -108.50                | -16.39                   |
| 2.17                          | 13.94                    | 351.89                    | -147.67                    | -136.65                 | -113.24                | -17.27                   |
| 2.13                          | 14.97                    | 358.77                    | -150.96                    | -137.63                 | -116.37                | -17.68                   |
| 2.08                          | 16.16                    | 366.71                    | -154.91                    | -138.80                 | -120.03                | -18.06                   |

**Table S6. EDA energy terms of TS4b along IRC**

| Energy terms<br>(in kcal/mol)         | $\Delta E_{\text{dist}}$ | $\Delta E_{\text{Pauli}}$ | $\Delta E_{\text{elstat}}$ | $\Delta E_{\text{pol}}$ | $\Delta E_{\text{ct}}$ | $\Delta E_{\text{disp}}$ |
|---------------------------------------|--------------------------|---------------------------|----------------------------|-------------------------|------------------------|--------------------------|
| <b>TS4b</b><br>$r(\text{C-N})$ (in Å) |                          |                           |                            |                         |                        |                          |
| 2.51                                  | 10.48                    | 305.60                    | -126.49                    | -124.85                 | -104.78                | -12.93                   |
| 2.46                                  | 10.00                    | 303.11                    | -123.83                    | -124.20                 | -102.90                | -13.68                   |
| 2.40                                  | 9.84                     | 303.81                    | -122.64                    | -124.36                 | -102.08                | -14.54                   |
| 2.35                                  | 10.04                    | 306.93                    | -122.63                    | -125.74                 | -102.37                | -15.18                   |
| 2.33                                  | 10.26                    | 308.79                    | -123.04                    | -126.13                 | -102.81                | -15.53                   |
| 2.25                                  | 11.40                    | 316.76                    | -125.57                    | -127.71                 | -105.33                | -16.65                   |
| 2.22                                  | 11.98                    | 320.26                    | -126.92                    | -128.34                 | -106.65                | -17.05                   |
| 2.19 (TS)                             | 12.68                    | 324.24                    | -128.58                    | -129.03                 | -108.25                | -17.47                   |
| 2.16                                  | 13.43                    | 328.46                    | -130.41                    | -129.76                 | -109.99                | -17.90                   |
| 2.10                                  | 15.23                    | 338.26                    | -135.08                    | -131.35                 | -114.25                | -18.78                   |

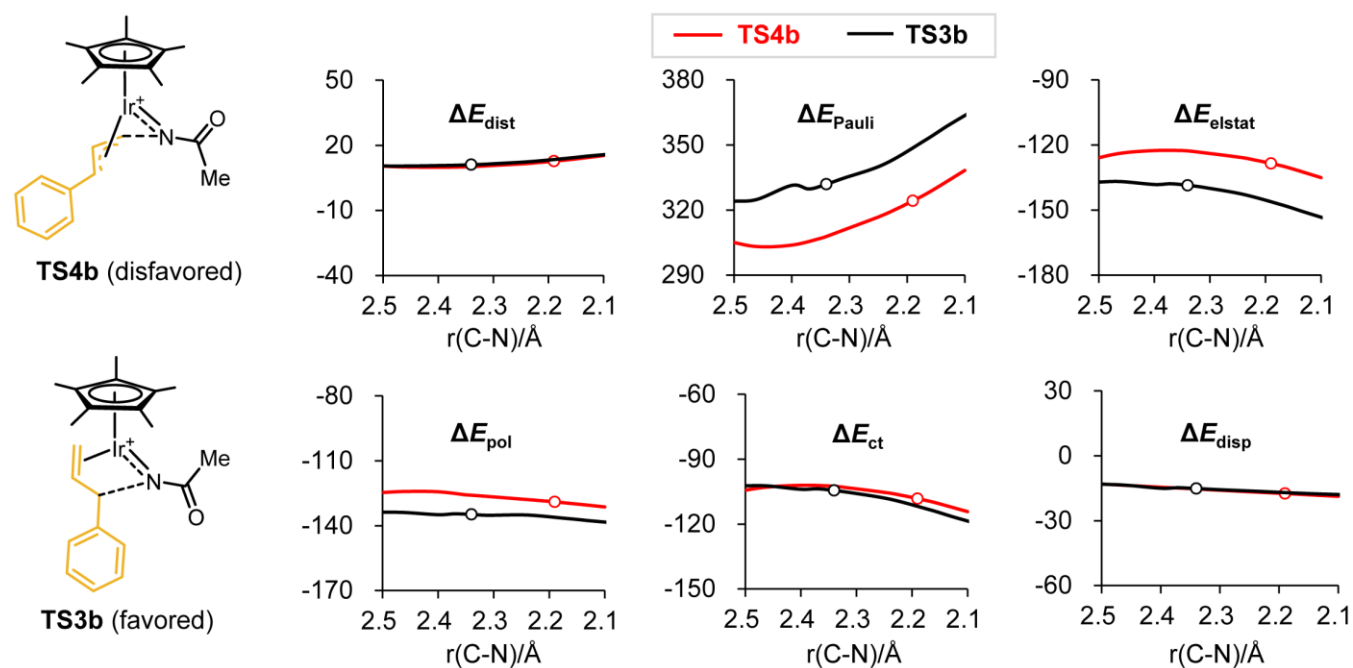

**Fig. S2** EDA results along IRC of Ir=N insertion with Ph-substituted allyl substrate (**TS3b** vs **TS4b**). Energies are shown in kcal/mol.

**Table S7. EDA energy terms of TS3c along IRC**

| Energy terms<br>(in kcal/mol)<br>TS3c<br>$r(\text{C-N})$ (in Å) | $\Delta E_{\text{dist}}$ | $\Delta E_{\text{Pauli}}$ | $\Delta E_{\text{elstat}}$ | $\Delta E_{\text{pol}}$ | $\Delta E_{\text{ct}}$ | $\Delta E_{\text{disp}}$ |
|-----------------------------------------------------------------|--------------------------|---------------------------|----------------------------|-------------------------|------------------------|--------------------------|
| 2.50                                                            | 11.44                    | 315.23                    | -140.76                    | -131.50                 | -96.40                 | -12.95                   |
| 2.48                                                            | 11.50                    | 316.13                    | -140.84                    | -131.62                 | -96.58                 | -13.24                   |
| 2.45                                                            | 11.58                    | 317.49                    | -141.10                    | -131.81                 | -96.90                 | -13.58                   |
| 2.41                                                            | 17.77                    | 319.29                    | -141.53                    | -132.05                 | -97.41                 | -13.97                   |
| 2.37                                                            | 17.93                    | 322.22                    | -142.45                    | -132.45                 | -98.31                 | -14.44                   |
| 2.33 (TS)                                                       | 12.11                    | 326.62                    | -144.00                    | -133.08                 | -99.79                 | -14.99                   |
| 2.28                                                            | 12.53                    | 331.74                    | -145.98                    | -133.79                 | -101.67                | -15.52                   |
| 2.23                                                            | 13.16                    | 338.28                    | -148.76                    | -134.63                 | -104.32                | -16.03                   |
| 2.17                                                            | 14.07                    | 346.82                    | -152.69                    | -135.63                 | -108.06                | -16.48                   |
| 2.11                                                            | 15.33                    | 357.72                    | -157.82                    | -136.88                 | -113.14                | -16.97                   |

**Table S8. EDA energy terms of TS4c along IRC**

| Energy terms<br>(in kcal/mol)<br>TS4c<br>$r(\text{C-N})$ (in Å) | $\Delta E_{\text{dist}}$ | $\Delta E_{\text{Pauli}}$ | $\Delta E_{\text{elstat}}$ | $\Delta E_{\text{pol}}$ | $\Delta E_{\text{ct}}$ | $\Delta E_{\text{disp}}$ |
|-----------------------------------------------------------------|--------------------------|---------------------------|----------------------------|-------------------------|------------------------|--------------------------|
| 2.50                                                            | 8.98                     | 282.54                    | -121.79                    | -118.66                 | -91.59                 | -12.46                   |
| 2.45                                                            | 8.41                     | 277.70                    | -118.14                    | -117.19                 | -89.40                 | -12.99                   |
| 2.42                                                            | 8.27                     | 276.63                    | -116.64                    | -116.74                 | -88.65                 | -13.45                   |
| 2.35                                                            | 8.42                     | 278.60                    | -115.97                    | -116.92                 | -88.80                 | -14.31                   |
| 2.33                                                            | 8.60                     | 280.24                    | -116.20                    | -117.20                 | -89.24                 | -14.65                   |
| 2.28                                                            | 9.19                     | 285.01                    | -117.37                    | -118.07                 | -90.82                 | -15.39                   |
| 2.25                                                            | 9.62                     | 288.14                    | -118.32                    | -118.62                 | -91.99                 | -15.79                   |
| 2.22                                                            | 10.13                    | 291.71                    | -119.52                    | -119.26                 | -93.38                 | -16.21                   |
| 2.16 (TS)                                                       | 11.52                    | 300.48                    | -122.87                    | -120.74                 | -97.12                 | -17.10                   |
| 2.10                                                            | 13.22                    | 310.96                    | -127.29                    | -122.51                 | -101.82                | -18.02                   |

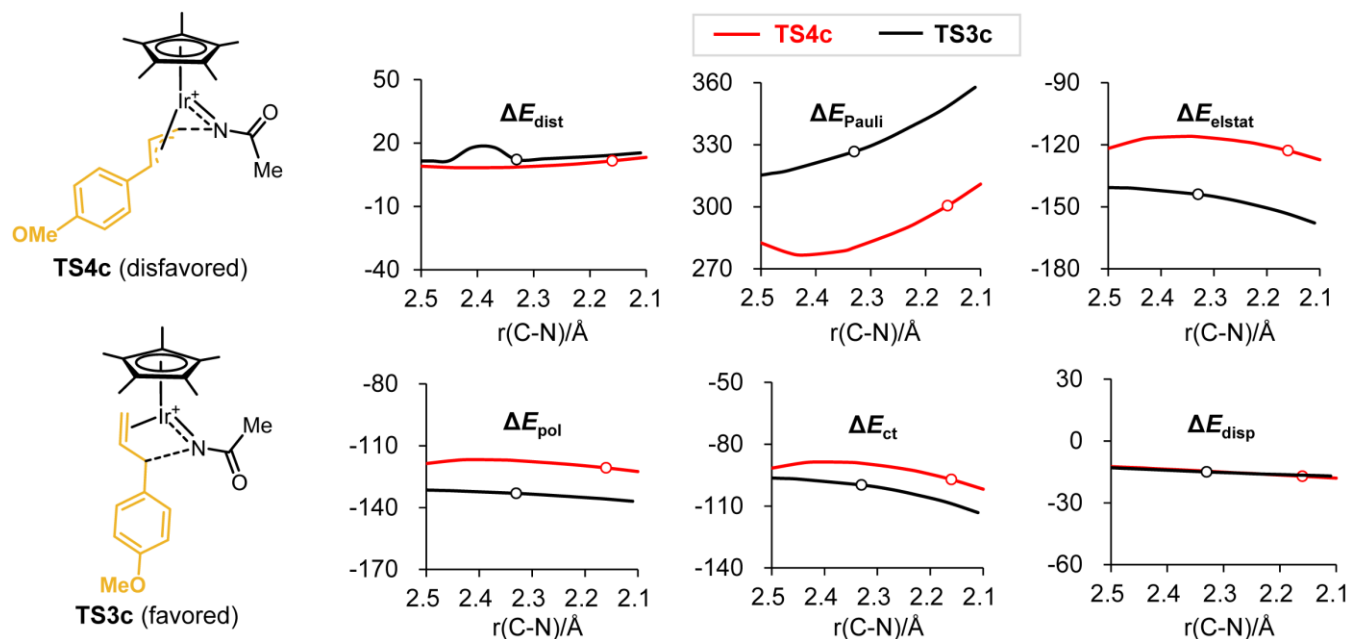

**Fig. S3** EDA results along IRC of Ir=N insertion with Ph-4-OMe-substituted allyl substrate (TS3c vs TS4c). Energies are shown in kcal/mol.

**Table S9.** EDA energy terms of TS3d along IRC

| Energy terms<br>(in kcal/mol)         | $\Delta E_{\text{dist}}$ | $\Delta E_{\text{Pauli}}$ | $\Delta E_{\text{elstat}}$ | $\Delta E_{\text{pol}}$ | $\Delta E_{\text{ct}}$ | $\Delta E_{\text{disp}}$ |
|---------------------------------------|--------------------------|---------------------------|----------------------------|-------------------------|------------------------|--------------------------|
| <b>TS3d</b><br>$r(\text{C-N})$ (in Å) |                          |                           |                            |                         |                        |                          |
| 2.51                                  | 10.93                    | -135.24                   | -13.57                     | -132.42                 | 325.48                 | -105.39                  |
| 2.45                                  | 10.84                    | -134.64                   | -14.31                     | -132.47                 | 326.34                 | -105.15                  |
| 2.41                                  | 10.91                    | -134.69                   | -14.92                     | -132.54                 | 327.85                 | -105.43                  |
| 2.36                                  | 11.18                    | -135.47                   | -15.64                     | -132.79                 | 330.84                 | -106.40                  |
| 2.33 (TS)                             | 11.42                    | -136.18                   | -16.03                     | -133.02                 | 332.97                 | -107.19                  |
| 2.26                                  | 12.25                    | -138.51                   | -16.88                     | -133.75                 | 338.98                 | -109.62                  |
| 2.23                                  | 12.84                    | -140.17                   | -17.33                     | -134.29                 | 342.94                 | -111.31                  |
| 2.19                                  | 13.61                    | -142.36                   | -17.78                     | -134.94                 | 347.83                 | -113.50                  |
| 2.12                                  | 15.69                    | 360.61                    | -148.48                    | -136.76                 | -119.37                | -18.68                   |
| 2.07                                  | 16.98                    | 368.64                    | -152.54                    | -137.99                 | -123.08                | -19.08                   |

**Table S8. EDA energy terms of TS4d along IRC**

| Energy terms<br>(in kcal/mol)         | $\Delta E_{\text{dist}}$ | $\Delta E_{\text{Pauli}}$ | $\Delta E_{\text{elstat}}$ | $\Delta E_{\text{pol}}$ | $\Delta E_{\text{ct}}$ | $\Delta E_{\text{disp}}$ |
|---------------------------------------|--------------------------|---------------------------|----------------------------|-------------------------|------------------------|--------------------------|
| <b>TS4d</b><br>$r(\text{C-N})$ (in Å) |                          |                           |                            |                         |                        |                          |
| 2.51                                  | 11.80                    | 315.23                    | -128.88                    | -126.59                 | -110.04                | -13.11                   |
| 2.46                                  | 11.18                    | 312.14                    | -126.02                    | -125.73                 | -107.93                | -13.86                   |
| 2.40                                  | 10.94                    | 312.19                    | -124.63                    | -125.70                 | -106.88                | -14.71                   |
| 2.36                                  | 11.09                    | 314.21                    | -124.68                    | -126.13                 | -106.98                | -15.35                   |
| 2.34                                  | 11.28                    | 315.79                    | -125.00                    | -126.47                 | -107.30                | -15.69                   |
| 2.26                                  | 12.32                    | 322.70                    | -127.18                    | -127.87                 | -109.38                | -16.80                   |
| 2.23                                  | 12.86                    | 325.73                    | -128.35                    | -128.42                 | -110.49                | -17.18                   |
| 2.20 (TS)                             | 13.51                    | 329.21                    | -129.83                    | -128.95                 | -111.94                | -17.58                   |
| 2.14                                  | 15.02                    | 337.07                    | -133.40                    | -130.30                 | -115.20                | -18.39                   |
| 2.11                                  | 15.93                    | 341.64                    | -135.67                    | -131.03                 | -117.19                | -18.80                   |

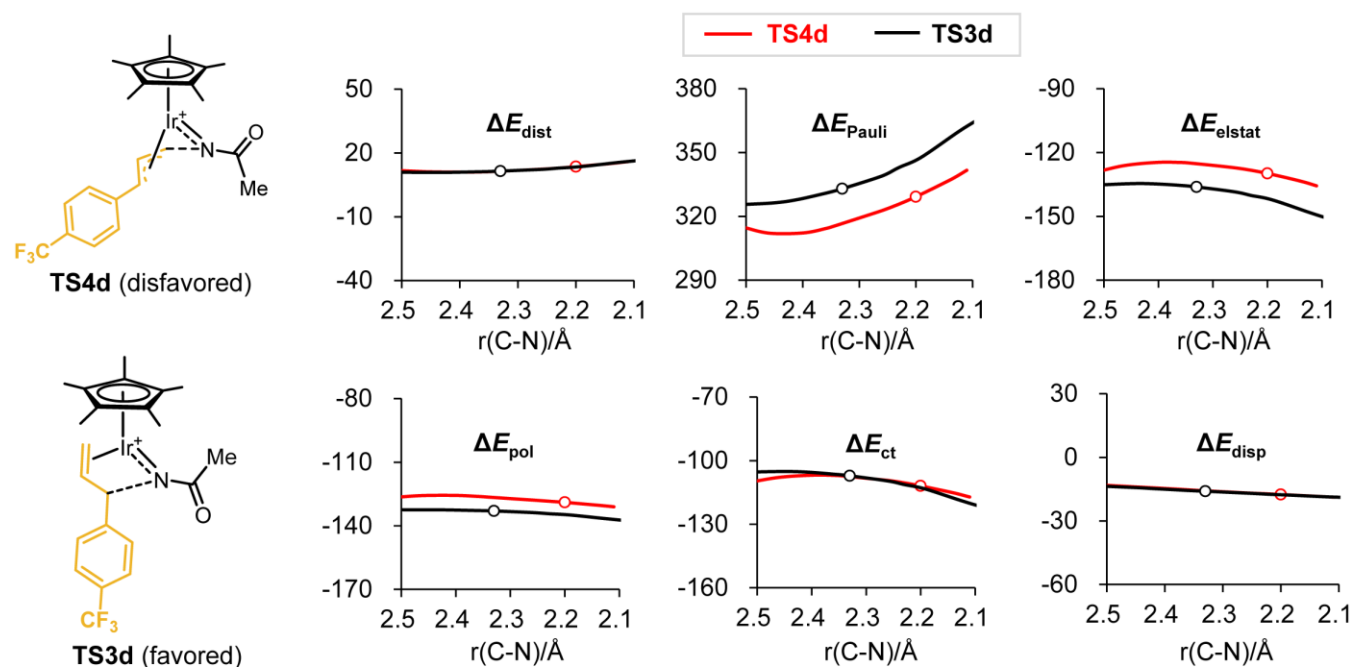

**Fig. S4** EDA results along IRC of Ir=N insertion with Ph-4-CF<sub>3</sub>-substituted allyl substrate (TS3d vs TS4d). Energies are shown in kcal/mol.



**Table S9. EDA energy terms of TS3e along IRC**

| Energy terms<br>(in kcal/mol)<br>TS3e<br>$r(\text{C-N})$ (in Å) | $\Delta E_{\text{dist}}$ | $\Delta E_{\text{Pauli}}$ | $\Delta E_{\text{elstat}}$ | $\Delta E_{\text{pol}}$ | $\Delta E_{\text{ct}}$ | $\Delta E_{\text{disp}}$ |
|-----------------------------------------------------------------|--------------------------|---------------------------|----------------------------|-------------------------|------------------------|--------------------------|
| 2.52                                                            | 4.54                     | 363.69                    | -148.77                    | -149.23                 | -120.39                | -14.12                   |
| 2.45                                                            | 4.31                     | 364.63                    | -147.64                    | -149.80                 | -119.33                | -15.10                   |
| 2.42                                                            | 4.26                     | 362.42                    | -146.53                    | -147.96                 | -118.98                | -15.57                   |
| 2.35                                                            | 4.39                     | 366.21                    | -146.85                    | -149.60                 | -118.98                | -16.56                   |
| 2.30 (TS)                                                       | 4.73                     | 367.84                    | -147.29                    | -149.25                 | -119.69                | -17.24                   |
| 2.28                                                            | 5.00                     | 369.13                    | -147.75                    | -149.20                 | -120.26                | -17.60                   |
| 2.25                                                            | 5.34                     | 370.86                    | -148.47                    | -149.21                 | -121.06                | -17.97                   |
| 2.22                                                            | 5.79                     | 373.10                    | -149.49                    | -149.27                 | -122.13                | -18.35                   |
| 2.15                                                            | 7.04                     | 379.30                    | -152.63                    | -149.60                 | -125.17                | -19.13                   |
| 2.12                                                            | 7.85                     | 383.38                    | -154.84                    | -149.90                 | -127.17                | -19.52                   |

**Table S10. EDA energy terms of TS4e along IRC**

| Energy terms<br>(in kcal/mol)<br>TS4e<br>$r(\text{C-N})$ (in Å) | $\Delta E_{\text{dist}}$ | $\Delta E_{\text{Pauli}}$ | $\Delta E_{\text{elstat}}$ | $\Delta E_{\text{pol}}$ | $\Delta E_{\text{ct}}$ | $\Delta E_{\text{disp}}$ |
|-----------------------------------------------------------------|--------------------------|---------------------------|----------------------------|-------------------------|------------------------|--------------------------|
| 2.52                                                            | 4.77                     | 350.34                    | -141.94                    | -143.92                 | -121.64                | -12.85                   |
| 2.45                                                            | 4.10                     | 351.06                    | -139.84                    | -144.38                 | -119.77                | -14.21                   |
| 2.41                                                            | 4.02                     | 352.94                    | -139.67                    | -144.99                 | -119.40                | -14.89                   |
| 2.36                                                            | 4.15                     | 352.90                    | -139.47                    | -143.73                 | -119.49                | -15.48                   |
| 2.31                                                            | 4.52                     | 358.93                    | -141.07                    | -146.14                 | -120.09                | -16.27                   |
| 2.28                                                            | 4.80                     | 360.85                    | -141.81                    | -146.35                 | -120.60                | -16.62                   |
| 2.23                                                            | 5.58                     | 365.53                    | -143.87                    | -146.84                 | -122.10                | -17.33                   |
| 2.21 (TS)                                                       | 6.10                     | 368.39                    | -145.29                    | -147.14                 | -123.13                | -17.68                   |
| 2.15                                                            | 7.33                     | 374.94                    | -148.75                    | -147.84                 | -125.64                | -18.42                   |
| 2.12                                                            | 8.07                     | 378.71                    | -150.96                    | -148.18                 | -127.19                | -18.78                   |

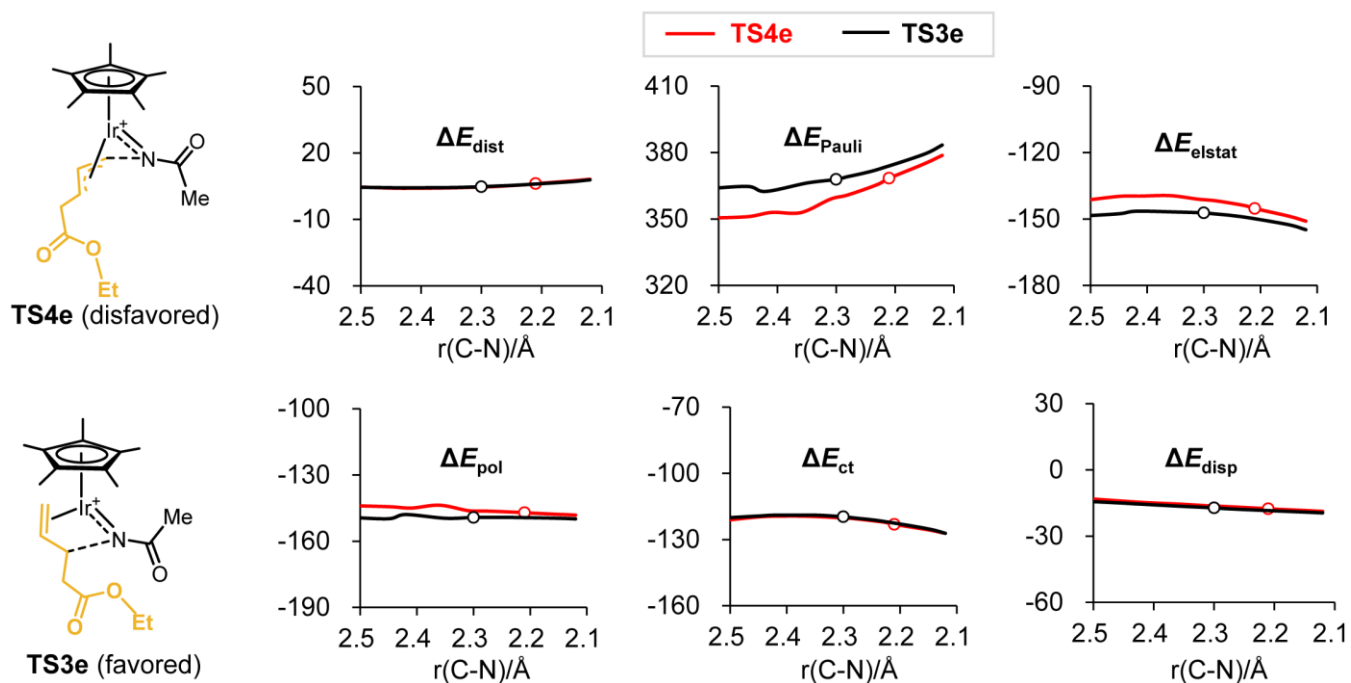

**Fig. S5** EDA results along IRC of Ir=N insertion with  $\text{CH}_2\text{CO}_2\text{Et}$ -substituted allyl substrate (TS3e vs TS4e). Energies are shown in kcal/mol.

**Table S11.** EDA energy terms of TS3f along IRC

| Energy terms<br>(in kcal/mol) | $\Delta E_{\text{dist}}$ | $\Delta E_{\text{Pauli}}$ | $\Delta E_{\text{elstat}}$ | $\Delta E_{\text{pol}}$ | $\Delta E_{\text{ct}}$ | $\Delta E_{\text{disp}}$ |
|-------------------------------|--------------------------|---------------------------|----------------------------|-------------------------|------------------------|--------------------------|
| <b>TS3f</b>                   |                          |                           |                            |                         |                        |                          |
| $r(\text{C-N})$ (in Å)        |                          |                           |                            |                         |                        |                          |
| 2.50                          | 12.55                    | 353.71                    | -151.82                    | -144.11                 | -115.76                | -12.21                   |
| 2.46                          | 12.38                    | 351.32                    | -150.74                    | -142.96                 | -114.30                | -12.55                   |
| 2.39 (TS)                     | 12.52                    | 349.28                    | -150.06                    | -141.42                 | -113.43                | -12.96                   |
| 2.34                          | 12.99                    | 348.78                    | -150.18                    | -140.36                 | -113.56                | -13.32                   |
| 2.30                          | 13.38                    | 349.14                    | -150.61                    | -139.81                 | -114.09                | -13.54                   |
| 2.27                          | 13.89                    | 350.16                    | -151.42                    | -139.32                 | -115.04                | -13.80                   |
| 2.23                          | 14.55                    | 352.03                    | -152.70                    | -138.91                 | -116.51                | -14.12                   |
| 2.18                          | 15.40                    | 354.98                    | -154.58                    | -138.64                 | -118.60                | -14.49                   |
| 2.14                          | 16.51                    | 359.29                    | -157.22                    | -138.58                 | -121.41                | -14.93                   |
| 2.09                          | 17.92                    | 365.26                    | -160.76                    | -138.82                 | -124.99                | -15.45                   |

**Table S12. EDA energy terms of TS4f along IRC**

| Energy terms<br>(in kcal/mol)         | $\Delta E_{\text{dist}}$ | $\Delta E_{\text{Pauli}}$ | $\Delta E_{\text{elstat}}$ | $\Delta E_{\text{pol}}$ | $\Delta E_{\text{ct}}$ | $\Delta E_{\text{disp}}$ |
|---------------------------------------|--------------------------|---------------------------|----------------------------|-------------------------|------------------------|--------------------------|
| <b>TS4f</b><br>$r(\text{C-N})$ (in Å) |                          |                           |                            |                         |                        |                          |
| 2.50                                  | 10.02                    | 334.69                    | -139.31                    | -136.78                 | -112.99                | -10.04                   |
| 2.46                                  | 9.95                     | 333.13                    | -138.38                    | -135.84                 | -112.03                | -10.26                   |
| 2.39                                  | 10.33                    | 333.23                    | -138.43                    | -134.96                 | -111.67                | -10.68                   |
| 2.35                                  | 10.79                    | 334.35                    | -139.13                    | -134.70                 | -111.97                | -10.95                   |
| 2.30                                  | 11.46                    | 336.27                    | -140.36                    | -134.52                 | -112.72                | -11.28                   |
| 2.25 (TS)                             | 12.46                    | 339.27                    | -142.35                    | -134.42                 | -114.09                | -11.68                   |
| 2.19                                  | 13.72                    | 343.27                    | -145.03                    | -134.42                 | -116.05                | -12.15                   |
| 2.17                                  | 14.51                    | 348.28                    | -147.10                    | -136.40                 | -117.34                | -12.55                   |
| 2.13                                  | 15.40                    | 351.24                    | -149.11                    | -136.50                 | -118.83                | -12.85                   |
| 2.10                                  | 16.38                    | 354.63                    | -151.43                    | -136.65                 | -120.54                | -13.18                   |

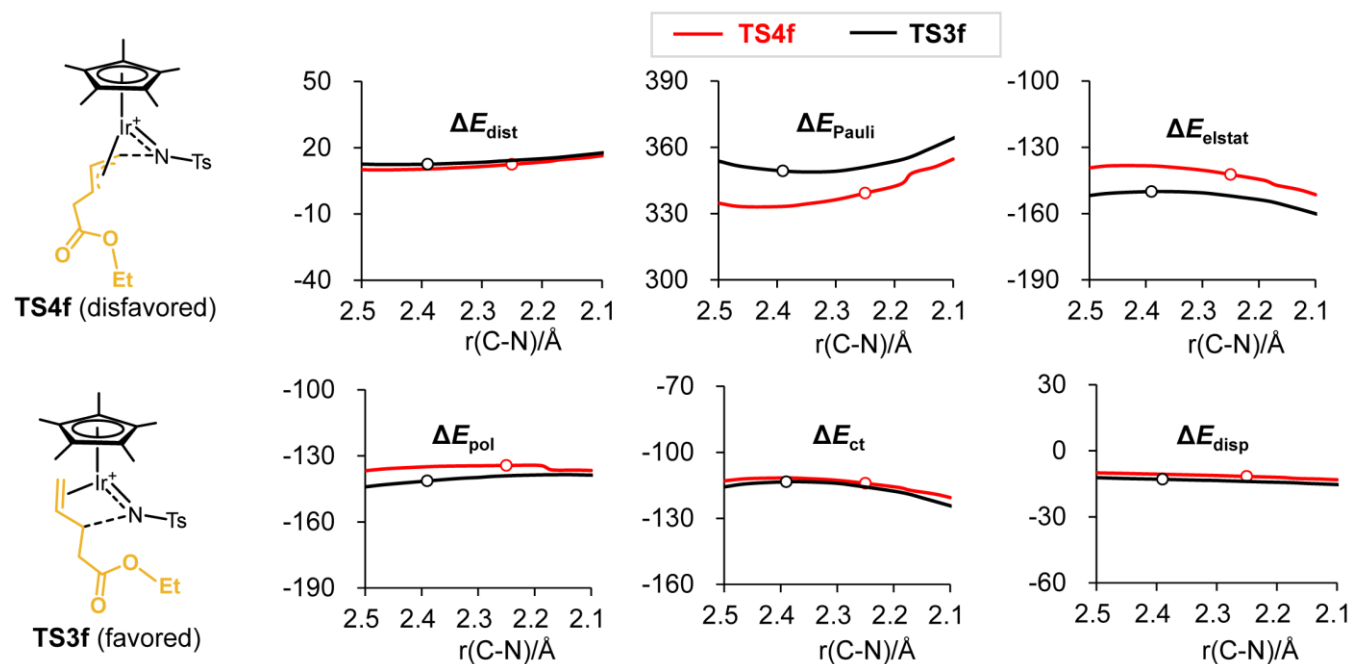

**Fig. S6** EDA results along IRC of Ir=N-Ts insertion with CH<sub>2</sub>CO<sub>2</sub>Et-substituted allyl substrate (TS3f vs TS4f). Energies are shown in kcal/mol.

**Table S13. EDA energy terms of TS3g along IRC**

| Energy terms<br>(in kcal/mol)<br>TS3g<br>$r(\text{C-N})$ (in Å) | $\Delta E_{\text{dist}}$ | $\Delta E_{\text{Pauli}}$ | $\Delta E_{\text{elstat}}$ | $\Delta E_{\text{pol}}$ | $\Delta E_{\text{ct}}$ | $\Delta E_{\text{disp}}$ |
|-----------------------------------------------------------------|--------------------------|---------------------------|----------------------------|-------------------------|------------------------|--------------------------|
| 2.52                                                            | 8.87                     | 302.15                    | -135.79                    | -122.23                 | -96.82                 | -8.98                    |
| 2.46                                                            | 8.89                     | 302.72                    | -135.55                    | -121.88                 | -96.87                 | -9.44                    |
| 2.43                                                            | 9.07                     | 303.55                    | -135.79                    | -121.82                 | -97.22                 | -9.68                    |
| 2.40 (TS)                                                       | 9.42                     | 305.13                    | -136.40                    | -121.87                 | -97.93                 | -10.00                   |
| 2.36                                                            | 9.88                     | 307.01                    | -137.16                    | -121.96                 | -98.82                 | -10.34                   |
| 2.32                                                            | 10.52                    | 309.74                    | -138.33                    | -122.18                 | -100.16                | -10.74                   |
| 2.28                                                            | 11.40                    | 315.24                    | -140.40                    | -123.76                 | -102.05                | -11.27                   |
| 2.23                                                            | 12.57                    | 320.57                    | -142.81                    | -124.38                 | -104.70                | -11.90                   |
| 2.18                                                            | 14.03                    | 327.79                    | -146.12                    | -125.32                 | -108.26                | -12.66                   |
| 2.13                                                            | 15.80                    | 337.40                    | -150.58                    | -126.75                 | -112.90                | -13.56                   |

**Table S14. EDA energy terms of TS4g along IRC**

| Energy terms<br>(in kcal/mol)<br>TS4g<br>$r(\text{C-N})$ (in Å) | $\Delta E_{\text{dist}}$ | $\Delta E_{\text{Pauli}}$ | $\Delta E_{\text{elstat}}$ | $\Delta E_{\text{pol}}$ | $\Delta E_{\text{ct}}$ | $\Delta E_{\text{disp}}$ |
|-----------------------------------------------------------------|--------------------------|---------------------------|----------------------------|-------------------------|------------------------|--------------------------|
| 2.52                                                            | 7.49                     | 290.69                    | -124.22                    | -116.98                 | -97.87                 | -10.76                   |
| 2.46                                                            | 6.92                     | 283.72                    | -120.42                    | -114.60                 | -94.86                 | -10.84                   |
| 2.39                                                            | 7.09                     | 282.23                    | -119.41                    | -113.61                 | -93.99                 | -11.11                   |
| 2.36                                                            | 7.50                     | 283.24                    | -119.79                    | -113.49                 | -94.32                 | -11.35                   |
| 2.29                                                            | 8.64                     | 287.03                    | -121.58                    | -113.70                 | -95.97                 | -11.87                   |
| 2.26                                                            | 9.21                     | 288.97                    | -122.56                    | -113.86                 | -96.91                 | -12.08                   |
| 2.24 (TS)                                                       | 9.91                     | 291.32                    | -123.79                    | -114.08                 | -98.08                 | -12.32                   |
| 2.21                                                            | 10.66                    | 293.82                    | -125.11                    | -114.32                 | -99.36                 | -12.58                   |
| 2.15                                                            | 12.52                    | 300.09                    | -128.55                    | -114.97                 | -102.64                | -13.16                   |
| 2.12                                                            | 13.63                    | 303.84                    | -130.68                    | -115.39                 | -104.63                | -13.49                   |

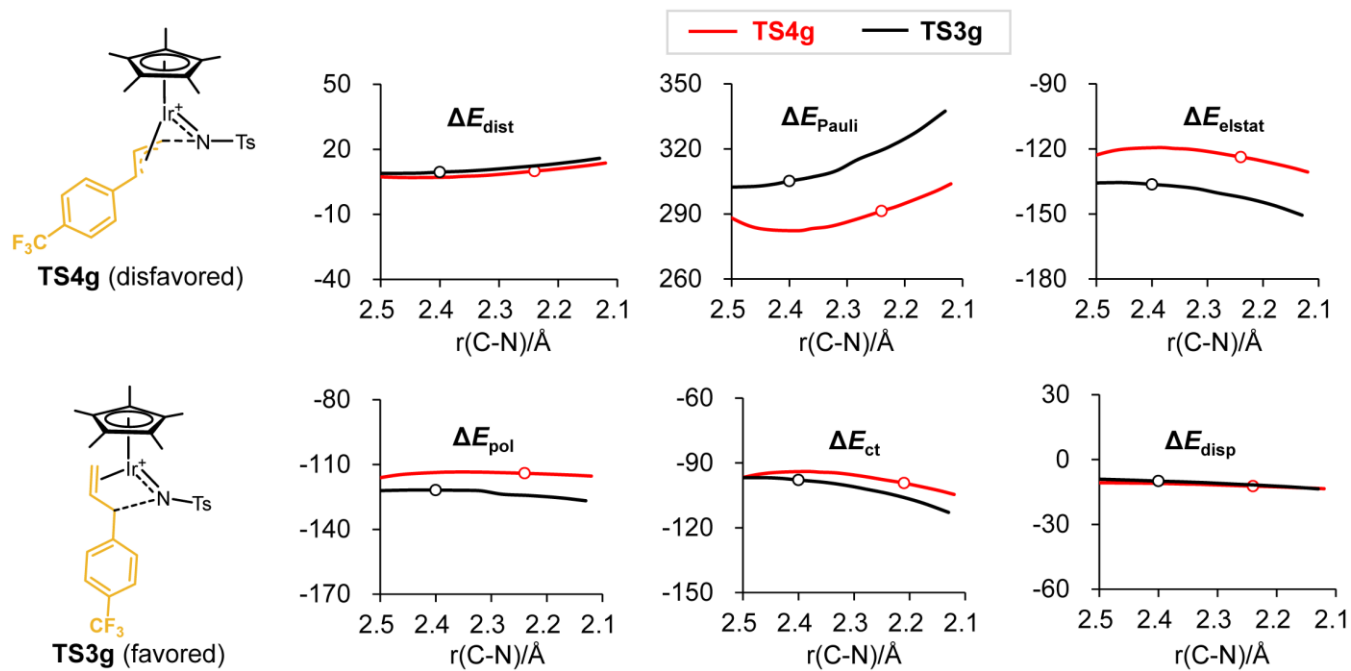

**Fig. S7** EDA results along IRC of Ir=N-Ts insertion with Ph-4-CF<sub>3</sub>-substituted allyl substrate (**TS3g** vs **TS4g**). Energies are shown in kcal/mol.

## Cartesian Coordinates (Å) and Energies of the Optimized Structures

M1

B3LYP SCF energy: -1115.20587500 a.u.  
B3LYP enthalpy: -1114.617875 a.u.  
B3LYP free energy: -1114.718132 a.u.  
B3LYP-D3BJ SCF energy in solution: -1116.54687038 a.u.  
B3LYP-D3BJ enthalpy in solution: -1115.958870 a.u.  
B3LYP-D3BJ free energy in solution: -1116.059127 a.u.  
Three lowest frequencies (cm-1): 18.7963 21.6864 31.6920

Cartesian coordinates

| ATOM | X         | Y         | Z         |
|------|-----------|-----------|-----------|
| C    | 1.519717  | 0.012404  | -0.105482 |
| C    | 0.375826  | -0.504485 | -0.933561 |
| C    | -0.316654 | 0.227524  | -1.900399 |
| H    | 0.321928  | -1.595525 | -1.003949 |
| H    | -0.062488 | 1.277351  | -2.072306 |
| H    | -0.811080 | -0.276473 | -2.734795 |
| C    | -1.420081 | 2.671798  | -0.052264 |
| O    | -2.248418 | 2.128539  | -0.852011 |
| O    | -0.746136 | 1.867186  | 0.669650  |
| C    | -1.223513 | 4.150551  | 0.009616  |
| H    | -2.119376 | 4.672812  | -0.350183 |
| H    | -0.376848 | 4.424685  | -0.641437 |
| H    | -0.973918 | 4.458968  | 1.033909  |
| H    | 1.468568  | 1.107011  | -0.021965 |
| H    | 1.445558  | -0.386642 | 0.920379  |
| C    | -3.608822 | -0.932077 | -0.482731 |
| C    | -3.684910 | -0.247850 | 0.812172  |
| C    | -2.681538 | -0.809293 | 1.664554  |
| C    | -1.939125 | -1.795764 | 0.904635  |
| C    | -2.553601 | -1.902319 | -0.412490 |
| C    | -4.707730 | 0.783702  | 1.174093  |
| H    | -5.676096 | 0.297187  | 1.381129  |
| H    | -4.863466 | 1.499974  | 0.355113  |
| H    | -4.421025 | 1.348368  | 2.071161  |
| C    | -4.550592 | -0.707615 | -1.622822 |
| H    | -5.493031 | -1.251579 | -1.436765 |
| H    | -4.138990 | -1.068705 | -2.574402 |
| H    | -4.798750 | 0.356768  | -1.737857 |
| C    | -2.226842 | -2.921505 | -1.459524 |
| H    | -2.834082 | -3.827163 | -1.290751 |
| H    | -1.173124 | -3.230226 | -1.430263 |
| H    | -2.452074 | -2.558876 | -2.471665 |
| C    | -0.889968 | -2.703874 | 1.468252  |
| H    | -1.370017 | -3.554969 | 1.981523  |
| H    | -0.256858 | -2.189428 | 2.204540  |
| H    | -0.238774 | -3.120096 | 0.688195  |
| C    | -2.409250 | -0.433296 | 3.084281  |
| H    | -2.927711 | -1.138215 | 3.757374  |
| H    | -2.767723 | 0.577520  | 3.317797  |

|    |           |           |           |
|----|-----------|-----------|-----------|
| H  | -1.336952 | -0.480798 | 3.318185  |
| C  | 2.875807  | -0.412624 | -0.708526 |
| C  | 4.067038  | 0.072987  | 0.124229  |
| H  | 2.955316  | -0.019455 | -1.737367 |
| H  | 2.913750  | -1.513336 | -0.799709 |
| H  | 4.021800  | 1.173591  | 0.215260  |
| H  | 3.973622  | -0.317536 | 1.154372  |
| Ir | -1.728142 | 0.128822  | -0.173942 |
| C  | 5.425730  | -0.335124 | -0.453285 |
| C  | 6.615731  | 0.148476  | 0.381463  |
| H  | 5.517516  | 0.056397  | -1.483192 |
| H  | 5.467147  | -1.436183 | -0.546152 |
| C  | 7.977652  | -0.260192 | -0.187115 |
| H  | 6.573170  | 1.249765  | 0.472258  |
| H  | 6.518869  | -0.240306 | 1.412300  |
| C  | 9.166918  | 0.221627  | 0.649967  |
| H  | 8.019210  | -1.361639 | -0.279422 |
| H  | 8.075503  | 0.129696  | -1.217577 |
| H  | 9.123173  | 1.322307  | 0.741114  |
| H  | 9.066280  | -0.167677 | 1.679599  |
| C  | 10.523868 | -0.190375 | 0.078130  |
| H  | 10.672356 | 0.215779  | -0.936458 |
| H  | 11.353127 | 0.172906  | 0.705246  |
| H  | 10.614858 | -1.287389 | 0.010045  |

TS1

|                                     |                     |         |         |
|-------------------------------------|---------------------|---------|---------|
| B3LYP SCF energy:                   | -1115.17125277 a.u. |         |         |
| B3LYP enthalpy:                     | -1114.589775 a.u.   |         |         |
| B3LYP free energy:                  | -1114.688471 a.u.   |         |         |
| B3LYP-D3BJ SCF energy in solution:  | -1116.51787315 a.u. |         |         |
| B3LYP-D3BJ enthalpy in solution:    | -1115.936395 a.u.   |         |         |
| B3LYP-D3BJ free energy in solution: | -1116.035091 a.u.   |         |         |
| Three lowest frequencies (cm-1):    | -1086.8156          | 12.5088 | 18.0455 |
| Imaginary frequency:                | -1086.8156 cm-1     |         |         |

Cartesian coordinates

| ATOM | X         | Y         | Z         |
|------|-----------|-----------|-----------|
| C    | 0.799475  | 0.714268  | -0.630085 |
| C    | 0.299968  | -0.273261 | -1.589144 |
| C    | -0.777930 | 0.063715  | -2.437279 |
| H    | 0.727818  | -1.281180 | -1.592436 |
| H    | -0.953283 | 1.103471  | -2.724703 |
| H    | -1.179665 | -0.693418 | -3.115114 |
| C    | -1.509880 | 2.851467  | 0.098183  |
| O    | -2.069022 | 1.955051  | -0.644253 |
| O    | -0.531221 | 2.591546  | 0.832099  |
| C    | -2.057685 | 4.250998  | 0.011469  |
| H    | -1.387958 | 4.846073  | -0.630862 |
| H    | -2.052087 | 4.714983  | 1.007292  |

|    |           |           |           |
|----|-----------|-----------|-----------|
| H  | -3.064483 | 4.261002  | -0.422940 |
| H  | 0.883569  | 1.714953  | -1.083381 |
| H  | -0.100537 | 1.308883  | 0.265106  |
| C  | -3.360877 | -0.965199 | 0.023330  |
| C  | -2.960100 | -0.353857 | 1.293409  |
| C  | -1.770463 | -0.995557 | 1.749679  |
| C  | -1.394427 | -1.994957 | 0.763222  |
| C  | -2.407797 | -2.011340 | -0.270053 |
| C  | -3.722768 | 0.719286  | 2.004338  |
| H  | -4.525704 | 0.265038  | 2.609943  |
| H  | -4.196492 | 1.413131  | 1.296784  |
| H  | -3.080798 | 1.298896  | 2.681179  |
| C  | -4.626597 | -0.669072 | -0.720572 |
| H  | -5.473618 | -1.209012 | -0.263497 |
| H  | -4.559391 | -0.977800 | -1.772309 |
| H  | -4.862128 | 0.403843  | -0.701096 |
| C  | -2.494226 | -2.994054 | -1.395676 |
| H  | -3.019682 | -3.901093 | -1.050525 |
| H  | -1.501722 | -3.306325 | -1.749301 |
| H  | -3.056156 | -2.592573 | -2.249433 |
| C  | -0.280668 | -2.985593 | 0.916169  |
| H  | -0.631358 | -3.852973 | 1.501681  |
| H  | 0.578896  | -2.558114 | 1.450400  |
| H  | 0.070875  | -3.367373 | -0.052171 |
| C  | -1.037903 | -0.708968 | 3.021936  |
| H  | -1.395470 | -1.383543 | 3.819176  |
| H  | -1.197266 | 0.323250  | 3.361083  |
| H  | 0.043547  | -0.870609 | 2.915365  |
| Ir | -1.417425 | -0.037485 | -0.321879 |
| C  | 1.992965  | 0.354436  | 0.242456  |
| C  | 3.323196  | 0.446159  | -0.522739 |
| H  | 1.860971  | -0.665007 | 0.643936  |
| H  | 2.024435  | 1.032496  | 1.111116  |
| H  | 3.286976  | -0.221137 | -1.403464 |
| H  | 3.437495  | 1.468707  | -0.925087 |
| C  | 4.544104  | 0.096004  | 0.333498  |
| C  | 5.869327  | 0.191023  | -0.429183 |
| H  | 4.426134  | -0.926503 | 0.738096  |
| H  | 4.576622  | 0.765655  | 1.212386  |
| C  | 7.096557  | -0.158653 | 0.417457  |
| H  | 5.831202  | -0.476112 | -1.310406 |
| H  | 5.983354  | 1.213872  | -0.832989 |
| C  | 8.420916  | -0.063567 | -0.347041 |
| H  | 7.134824  | 0.509465  | 1.298038  |
| H  | 6.981946  | -1.181484 | 0.822745  |
| H  | 8.380434  | -0.732090 | -1.226371 |
| H  | 8.531578  | 0.958257  | -0.753286 |
| C  | 9.643128  | -0.410817 | 0.503562  |
| H  | 9.581600  | -1.440354 | 0.894188  |
| H  | 10.574543 | -0.332070 | -0.078583 |
| H  | 9.734736  | 0.265605  | 1.369723  |



2a

B3LYP SCF energy: -396.21558782 a.u.  
B3LYP enthalpy: -396.142418 a.u.  
B3LYP free energy: -396.178749 a.u.  
B3LYP-D3BJ SCF energy in solution: -396.69900251 a.u.  
B3LYP-D3BJ enthalpy in solution: -396.625833 a.u.  
B3LYP-D3BJ free energy in solution: -396.662164 a.u.  
Three lowest frequencies (cm-1): 163.2176 178.0284 300.5262

Cartesian coordinates

| ATOM | X         | Y         | Z         |
|------|-----------|-----------|-----------|
| C    | 0.980421  | 0.012957  | 0.000084  |
| C    | -1.201260 | -0.181249 | 0.000383  |
| O    | -0.018652 | -0.902935 | -0.000037 |
| O    | -0.838730 | 1.125131  | -0.000043 |
| O    | -2.296103 | -0.631836 | -0.000170 |
| N    | 0.567248  | 1.228793  | -0.000057 |
| C    | 2.390701  | -0.439621 | -0.000032 |
| H    | 2.592510  | -1.056186 | 0.889828  |
| H    | 2.592467  | -1.055818 | -0.890162 |
| H    | 3.052991  | 0.435048  | 0.000117  |

M2

B3LYP SCF energy: -1282.50189188 a.u.  
B3LYP enthalpy: -1281.907773 a.u.  
B3LYP free energy: -1282.010399 a.u.  
B3LYP-D3BJ SCF energy in solution: -1284.04858384 a.u.  
B3LYP-D3BJ enthalpy in solution: -1283.454465 a.u.  
B3LYP-D3BJ free energy in solution: -1283.557091 a.u.  
Three lowest frequencies (cm-1): 14.8870 22.1984 25.1070

Cartesian coordinates

| ATOM | X         | Y         | Z         |
|------|-----------|-----------|-----------|
| C    | 0.907787  | 0.261257  | -0.817661 |
| C    | 0.315335  | -0.551955 | -1.817449 |
| C    | -0.901811 | -0.127046 | -2.435369 |
| H    | 0.673357  | -1.577597 | -1.957432 |
| H    | -1.008788 | 0.927592  | -2.707124 |
| H    | -1.409223 | -0.820654 | -3.111870 |
| H    | 0.807729  | 1.345562  | -0.935667 |
| C    | -3.095219 | -1.115034 | 0.712073  |
| C    | -2.091220 | -0.866451 | 1.756843  |
| C    | -0.997743 | -1.751529 | 1.547904  |
| C    | -1.265115 | -2.499896 | 0.325936  |
| C    | -2.601344 | -2.154324 | -0.133939 |
| C    | -2.276133 | 0.048574  | 2.929839  |

|   |           |           |           |
|---|-----------|-----------|-----------|
| H | -2.823407 | -0.475500 | 3.732410  |
| H | -2.862297 | 0.941466  | 2.671317  |
| H | -1.316192 | 0.382664  | 3.345892  |
| C | -4.468851 | -0.514047 | 0.684424  |
| H | -5.138069 | -1.059070 | 1.372387  |
| H | -4.919592 | -0.561766 | -0.316464 |
| H | -4.464700 | 0.536025  | 1.010912  |
| C | -3.337373 | -2.823509 | -1.254321 |
| H | -3.845724 | -3.729137 | -0.880526 |
| H | -2.660675 | -3.140355 | -2.060170 |
| H | -4.105120 | -2.170566 | -1.691467 |
| C | -0.444370 | -3.648037 | -0.182783 |
| H | -0.735572 | -4.577209 | 0.336449  |
| H | 0.629072  | -3.497450 | -0.003526 |
| H | -0.591043 | -3.816372 | -1.258823 |
| C | 0.177716  | -1.938120 | 2.454414  |
| H | -0.064682 | -2.687332 | 3.228196  |
| H | 0.450735  | -1.007189 | 2.969780  |
| H | 1.062630  | -2.300967 | 1.915829  |
| C | -2.465359 | 2.541869  | -0.710257 |
| C | -1.307958 | 3.760278  | 0.721505  |
| O | -2.337166 | 3.780929  | -0.215333 |
| O | -0.858871 | 2.469676  | 0.738260  |
| O | -0.917711 | 4.665792  | 1.360745  |
| N | -1.615230 | 1.712673  | -0.187007 |
| C | -3.502250 | 2.276140  | -1.730170 |
| H | -3.299685 | 2.883061  | -2.627178 |
| H | -4.484318 | 2.585331  | -1.339369 |
| H | -3.517911 | 1.213072  | -1.993168 |
| C | 2.120200  | -0.171537 | -0.035227 |
| C | 3.439913  | 0.299492  | -0.675348 |
| H | 2.131093  | -1.270682 | 0.061483  |
| H | 2.056191  | 0.232317  | 0.989367  |
| C | 4.679604  | -0.120271 | 0.120744  |
| H | 3.507085  | -0.097126 | -1.704412 |
| H | 3.421619  | 1.399634  | -0.776201 |
| C | 5.998003  | 0.346571  | -0.503744 |
| H | 4.601596  | 0.275015  | 1.150459  |
| H | 4.692827  | -1.221550 | 0.221709  |
| H | 6.072713  | -0.046604 | -1.534562 |
| H | 5.983596  | 1.447647  | -0.603390 |
| C | 7.238436  | -0.074085 | 0.290081  |
| C | 8.558747  | 0.393317  | -0.330638 |
| H | 7.252342  | -1.175721 | 0.389225  |
| H | 7.161668  | 0.317869  | 1.321580  |
| C | 9.791843  | -0.030094 | 0.468382  |
| H | 8.633476  | 0.001085  | -1.361271 |
| H | 8.542558  | 1.493940  | -0.429975 |
| H | 9.766344  | 0.378354  | 1.492512  |
| H | 9.858158  | -1.127747 | 0.552962  |
| H | 10.720797 | 0.322574  | -0.006359 |

Ir -1.212974 -0.375219 -0.279679

TS2

B3LYP SCF energy: -1282.47431105 a.u.  
B3LYP enthalpy: -1281.882905 a.u.  
B3LYP free energy: -1281.988178 a.u.  
B3LYP-D3BJ SCF energy in solution: -1284.03898077 a.u.  
B3LYP-D3BJ enthalpy in solution: -1283.447575 a.u.  
B3LYP-D3BJ free energy in solution: -1283.552848 a.u.  
Three lowest frequencies (cm-1): -283.1984 14.2626 18.6004  
Imaginary frequency: -283.1984 cm-1

Cartesian coordinates

| ATOM | X         | Y         | Z         |
|------|-----------|-----------|-----------|
| C    | 0.862277  | -0.028696 | -0.998907 |
| C    | 0.130687  | -0.909551 | -1.824404 |
| C    | -1.046352 | -0.457397 | -2.491039 |
| H    | 0.367404  | -1.978549 | -1.800359 |
| H    | -1.082729 | 0.562112  | -2.881797 |
| H    | -1.654881 | -1.185372 | -3.033474 |
| H    | 0.794771  | 1.042806  | -1.203342 |
| C    | -3.291518 | -0.845919 | 0.772150  |
| C    | -2.268696 | -0.556642 | 1.761078  |
| C    | -1.223683 | -1.539456 | 1.623555  |
| C    | -1.589285 | -2.430360 | 0.541382  |
| C    | -2.871763 | -2.009097 | 0.027103  |
| C    | -2.317620 | 0.512783  | 2.806758  |
| H    | -2.637676 | 0.077327  | 3.768964  |
| H    | -3.030241 | 1.306676  | 2.548698  |
| H    | -1.333337 | 0.978065  | 2.953031  |
| C    | -4.613334 | -0.153112 | 0.649871  |
| H    | -5.350548 | -0.642367 | 1.309905  |
| H    | -5.008371 | -0.196846 | -0.374226 |
| H    | -4.554137 | 0.900830  | 0.952768  |
| C    | -3.685879 | -2.726600 | -1.005453 |
| H    | -4.321571 | -3.483588 | -0.514277 |
| H    | -3.056862 | -3.255238 | -1.734730 |
| H    | -4.350459 | -2.044920 | -1.553363 |
| C    | -0.863258 | -3.686172 | 0.159259  |
| H    | -1.205340 | -4.521121 | 0.794286  |
| H    | 0.222831  | -3.595721 | 0.299447  |
| H    | -1.053252 | -3.974187 | -0.884089 |
| C    | -0.047250 | -1.678980 | 2.537379  |
| H    | -0.348375 | -2.232448 | 3.443931  |
| H    | 0.336205  | -0.701251 | 2.860543  |
| H    | 0.775702  | -2.235710 | 2.071596  |
| C    | -1.908101 | 2.750824  | -0.728629 |
| C    | -0.181457 | 3.645313  | 0.818898  |
| O    | -1.450501 | 3.843723  | -0.255192 |

|    |           |           |           |
|----|-----------|-----------|-----------|
| O  | 0.010287  | 2.425649  | 0.877597  |
| O  | 0.196912  | 4.681007  | 1.235915  |
| N  | -1.477725 | 1.558608  | -0.448813 |
| C  | -3.059677 | 2.872463  | -1.711126 |
| H  | -2.718937 | 3.490862  | -2.555215 |
| H  | -3.876643 | 3.411659  | -1.208558 |
| H  | -3.413975 | 1.900605  | -2.073109 |
| C  | 2.028439  | -0.439792 | -0.155815 |
| C  | 3.369682  | -0.037747 | -0.809570 |
| H  | 2.014902  | -1.527293 | 0.027340  |
| H  | 1.953356  | 0.064162  | 0.821510  |
| C  | 4.580520  | -0.419467 | 0.048603  |
| H  | 3.451107  | -0.512524 | -1.803379 |
| H  | 3.371126  | 1.051864  | -0.987287 |
| C  | 5.919836  | -0.007279 | -0.570017 |
| H  | 4.478149  | 0.046062  | 1.045918  |
| H  | 4.576948  | -1.511617 | 0.221827  |
| H  | 6.018799  | -0.469467 | -1.569608 |
| H  | 5.919680  | 1.084665  | -0.742072 |
| C  | 7.132098  | -0.385419 | 0.286554  |
| C  | 8.473947  | 0.033375  | -0.322703 |
| H  | 7.133588  | -1.478564 | 0.455710  |
| H  | 7.027802  | 0.072482  | 1.287923  |
| C  | 9.678844  | -0.345556 | 0.539094  |
| H  | 8.576276  | -0.424396 | -1.323514 |
| H  | 8.469292  | 1.125437  | -0.492060 |
| H  | 9.626661  | 0.128954  | 1.533258  |
| H  | 9.733525  | -1.435789 | 0.696386  |
| H  | 10.624169 | -0.030304 | 0.070540  |
| Ir | -1.369288 | -0.328126 | -0.310105 |

M3

|                                     |                                  |
|-------------------------------------|----------------------------------|
| B3LYP SCF energy:                   | -1094.05860155 a.u.              |
| B3LYP enthalpy:                     | -1093.483451 a.u.                |
| B3LYP free energy:                  | -1093.583819 a.u.                |
| B3LYP-D3BJ SCF energy in solution:  | -1095.38768262 a.u.              |
| B3LYP-D3BJ enthalpy in solution:    | -1094.812532 a.u.                |
| B3LYP-D3BJ free energy in solution: | -1094.912900 a.u.                |
| Three lowest frequencies (cm-1):    | 9.3633      21.1553      25.5529 |

Cartesian coordinates

| ATOM | X         | Y         | Z         |
|------|-----------|-----------|-----------|
| C    | -1.493420 | -2.207658 | -0.216856 |
| C    | -1.329549 | -1.759839 | 1.153131  |
| C    | -2.504006 | -1.003580 | 1.519025  |
| C    | -3.381368 | -0.971722 | 0.370165  |
| C    | -2.748912 | -1.715281 | -0.701789 |
| C    | -0.587011 | -3.159336 | -0.938559 |
| H    | -0.666019 | -3.061319 | -2.030175 |

|    |           |           |           |
|----|-----------|-----------|-----------|
| H  | 0.466220  | -3.028947 | -0.655169 |
| C  | -0.227455 | -2.163048 | 2.081637  |
| H  | 0.704290  | -2.383898 | 1.545621  |
| H  | -0.519298 | -3.079167 | 2.624247  |
| H  | -0.017724 | -1.388077 | 2.831324  |
| C  | -2.818896 | -0.420310 | 2.859824  |
| H  | -1.930037 | -0.371598 | 3.502008  |
| H  | -3.576377 | -1.035181 | 3.373949  |
| H  | -3.218557 | 0.599887  | 2.763192  |
| C  | -4.759709 | -0.391442 | 0.343593  |
| H  | -4.857707 | 0.457302  | 1.032987  |
| H  | -5.486474 | -1.161418 | 0.657723  |
| H  | -5.048847 | -0.057972 | -0.662328 |
| C  | -3.371134 | -2.027671 | -2.028542 |
| H  | -4.054566 | -1.233868 | -2.359590 |
| H  | -3.960070 | -2.958341 | -1.955477 |
| H  | -2.617682 | -2.181758 | -2.813479 |
| Ir | -1.454206 | 0.130736  | -0.158662 |
| H  | -0.863612 | -4.197545 | -0.686370 |
| C  | -1.084009 | 1.011966  | -2.135166 |
| C  | 0.076840  | 0.293190  | -1.724454 |
| H  | -1.677277 | 0.620785  | -2.965527 |
| H  | -1.110152 | 2.098610  | -2.022224 |
| H  | 0.320979  | -0.668587 | -2.188103 |
| C  | 0.786477  | 0.703510  | -0.571217 |
| H  | 0.728518  | 1.754961  | -0.266772 |
| C  | 1.939889  | -0.060387 | 0.002663  |
| H  | 1.893303  | -1.123752 | -0.284889 |
| H  | 1.894608  | -0.013408 | 1.103289  |
| N  | -1.765418 | 1.805990  | 0.602198  |
| C  | -1.368600 | 3.102024  | 0.404026  |
| O  | -0.226940 | 3.446054  | 0.687577  |
| C  | -2.453105 | 4.060571  | -0.035422 |
| H  | -2.000533 | 4.835666  | -0.671014 |
| H  | -2.869114 | 4.554000  | 0.858052  |
| H  | -3.274991 | 3.557415  | -0.565605 |
| C  | 3.289920  | 0.537871  | -0.455669 |
| C  | 4.490819  | -0.198254 | 0.148176  |
| H  | 3.327364  | 1.605131  | -0.176819 |
| H  | 3.347767  | 0.505470  | -1.558015 |
| C  | 5.842291  | 0.362264  | -0.305321 |
| H  | 4.425931  | -0.153956 | 1.250841  |
| H  | 4.432986  | -1.270675 | -0.115667 |
| H  | 5.904456  | 0.317098  | -1.408307 |
| H  | 5.898296  | 1.434952  | -0.044459 |
| C  | 7.042050  | -0.371982 | 0.301219  |
| H  | 6.979722  | -1.446503 | 0.045775  |
| H  | 6.980280  | -0.322496 | 1.404422  |
| C  | 8.398035  | 0.176960  | -0.153857 |
| C  | 9.589372  | -0.562130 | 0.456548  |
| H  | 8.458238  | 1.250497  | 0.101397  |

|   |           |           |           |
|---|-----------|-----------|-----------|
| H | 8.457320  | 0.127510  | -1.256396 |
| H | 10.545697 | -0.142237 | 0.107723  |
| H | 9.580493  | -0.498041 | 1.557485  |
| H | 9.578729  | -1.631895 | 0.188380  |

TS3a

|                                     |                     |         |         |
|-------------------------------------|---------------------|---------|---------|
| B3LYP SCF energy:                   | -1094.05063902 a.u. |         |         |
| B3LYP enthalpy:                     | -1093.476521 a.u.   |         |         |
| B3LYP free energy:                  | -1093.573865 a.u.   |         |         |
| B3LYP-D3BJ SCF energy in solution:  | -1095.37707224 a.u. |         |         |
| B3LYP-D3BJ enthalpy in solution:    | -1094.802954 a.u.   |         |         |
| B3LYP-D3BJ free energy in solution: | -1094.900298 a.u.   |         |         |
| Three lowest frequencies (cm-1):    | -187.6282           | 14.3079 | 24.1531 |
| Imaginary frequency:                | -187.6282 cm-1      |         |         |

Cartesian coordinates

| ATOM | X         | Y         | Z         |
|------|-----------|-----------|-----------|
| C    | -1.104053 | -0.623468 | -2.503224 |
| C    | 0.042752  | -0.862470 | -1.712182 |
| C    | 0.937771  | 0.190204  | -1.321252 |
| H    | 0.268461  | -1.870373 | -1.346999 |
| C    | -0.586592 | 2.716858  | -0.029437 |
| C    | -1.320795 | 3.976270  | -0.444821 |
| H    | -1.550158 | 4.567282  | 0.453117  |
| H    | -0.652572 | 4.575997  | -1.084642 |
| H    | -2.235879 | 3.765299  | -1.016583 |
| C    | -1.770706 | -0.528271 | 1.825932  |
| C    | -2.826539 | 0.329150  | 1.367986  |
| C    | -3.570085 | -0.404912 | 0.340058  |
| C    | -2.990314 | -1.726087 | 0.219813  |
| C    | -1.867388 | -1.787950 | 1.100841  |
| C    | -3.191476 | 1.660141  | 1.950733  |
| H    | -3.872506 | 1.520442  | 2.807705  |
| H    | -2.303502 | 2.196232  | 2.313050  |
| H    | -3.707285 | 2.300046  | 1.221822  |
| C    | -0.786718 | -0.187987 | 2.900083  |
| H    | -1.273566 | -0.255728 | 3.888497  |
| H    | 0.069645  | -0.874934 | 2.906463  |
| H    | -0.404997 | 0.836290  | 2.777047  |
| C    | -0.988516 | -2.979720 | 1.326486  |
| H    | -1.369838 | -3.565582 | 2.180545  |
| H    | -0.968168 | -3.650021 | 0.456238  |
| H    | 0.044359  | -2.691932 | 1.567646  |
| C    | -3.513217 | -2.836596 | -0.640086 |
| H    | -4.244922 | -3.438787 | -0.074775 |
| H    | -4.025457 | -2.455491 | -1.534164 |
| H    | -2.715231 | -3.517570 | -0.967736 |
| C    | -4.824569 | 0.067508  | -0.325344 |
| H    | -5.696882 | -0.193772 | 0.299287  |

|    |           |           |           |
|----|-----------|-----------|-----------|
| H  | -4.828894 | 1.157585  | -0.460359 |
| H  | -4.968984 | -0.399716 | -1.308884 |
| H  | -1.175957 | 0.287391  | -3.100036 |
| O  | 0.198206  | 2.674998  | 0.911236  |
| N  | -0.783348 | 1.637468  | -0.861712 |
| Ir | -1.531481 | -0.046049 | -0.373947 |
| H  | -1.700969 | -1.471759 | -2.844601 |
| H  | 1.042364  | 1.035594  | -2.001586 |
| C  | 2.008301  | 0.035539  | -0.302932 |
| C  | 3.409796  | -0.004127 | -0.961053 |
| H  | 1.841367  | -0.866613 | 0.307949  |
| H  | 1.958670  | 0.908085  | 0.371446  |
| H  | 3.464978  | -0.847568 | -1.671385 |
| H  | 3.554706  | 0.913335  | -1.557746 |
| C  | 4.531816  | -0.125782 | 0.076142  |
| C  | 5.932285  | -0.133481 | -0.544370 |
| H  | 4.385783  | -1.049134 | 0.666141  |
| H  | 4.450286  | 0.709751  | 0.794625  |
| C  | 7.057036  | -0.254036 | 0.488659  |
| H  | 6.008116  | -0.965986 | -1.267981 |
| H  | 6.074194  | 0.791300  | -1.133157 |
| C  | 8.461256  | -0.248134 | -0.124199 |
| H  | 6.973541  | 0.574295  | 1.216632  |
| H  | 6.917798  | -1.182386 | 1.073591  |
| H  | 8.542501  | -1.075382 | -0.852594 |
| H  | 8.597036  | 0.679966  | -0.708584 |
| C  | 9.578386  | -0.367211 | 0.913096  |
| H  | 9.494350  | -1.304222 | 1.488586  |
| H  | 10.571651 | -0.357797 | 0.437860  |
| H  | 9.547220  | 0.466750  | 1.633998  |

#### TS4a

|                                     |                                     |
|-------------------------------------|-------------------------------------|
| B3LYP SCF energy:                   | -1094.04309306 a.u.                 |
| B3LYP enthalpy:                     | -1093.468764 a.u.                   |
| B3LYP free energy:                  | -1093.565707 a.u.                   |
| B3LYP-D3BJ SCF energy in solution:  | -1095.37261924 a.u.                 |
| B3LYP-D3BJ enthalpy in solution:    | -1094.798290 a.u.                   |
| B3LYP-D3BJ free energy in solution: | -1094.895233 a.u.                   |
| Three lowest frequencies (cm-1):    | -277.7040      17.1125      27.5642 |
| Imaginary frequency:                | -277.7040 cm-1                      |

#### Cartesian coordinates

| ATOM | X         | Y         | Z         |
|------|-----------|-----------|-----------|
| C    | 0.958268  | 0.896654  | -0.303683 |
| C    | 0.275850  | 0.714543  | -1.514660 |
| C    | -0.815035 | 1.561638  | -1.921314 |
| H    | 0.512561  | -0.150346 | -2.144863 |
| C    | -2.891435 | 2.521425  | 0.191646  |
| C    | -3.077160 | 3.348627  | 1.450949  |

|    |           |           |           |
|----|-----------|-----------|-----------|
| H  | -4.124762 | 3.269810  | 1.774169  |
| H  | -2.875579 | 4.403866  | 1.203743  |
| H  | -2.396367 | 3.052434  | 2.261510  |
| C  | -2.978364 | -1.305674 | -0.589226 |
| C  | -3.040321 | -0.940797 | 0.801444  |
| C  | -1.820238 | -1.437874 | 1.433630  |
| C  | -1.052774 | -2.155140 | 0.439206  |
| C  | -1.739932 | -2.041329 | -0.809691 |
| C  | -4.211376 | -0.314049 | 1.493195  |
| H  | -4.921456 | -1.098337 | 1.806921  |
| H  | -4.747415 | 0.378985  | 0.830300  |
| H  | -3.908391 | 0.235024  | 2.395279  |
| C  | -4.041378 | -1.025351 | -1.603582 |
| H  | -4.865756 | -1.750260 | -1.486633 |
| H  | -3.664048 | -1.118487 | -2.630760 |
| H  | -4.453381 | -0.013751 | -1.478013 |
| C  | -1.326970 | -2.664110 | -2.108673 |
| H  | -1.803576 | -3.653362 | -2.217877 |
| H  | -0.240634 | -2.817424 | -2.166362 |
| H  | -1.636760 | -2.059549 | -2.972778 |
| C  | 0.196702  | -2.934485 | 0.707266  |
| H  | -0.068271 | -3.935793 | 1.088514  |
| H  | 0.829054  | -2.453480 | 1.465930  |
| H  | 0.798193  | -3.079024 | -0.199914 |
| C  | -1.504812 | -1.368721 | 2.895186  |
| H  | -1.924143 | -2.251706 | 3.408732  |
| H  | -1.938267 | -0.475678 | 3.365323  |
| H  | -0.421854 | -1.361630 | 3.079131  |
| H  | 0.825772  | 1.851816  | 0.210973  |
| O  | -3.733150 | 2.427621  | -0.687875 |
| N  | -1.633895 | 1.959922  | 0.088949  |
| H  | -0.758858 | 2.639419  | -1.784730 |
| H  | -1.471849 | 1.229158  | -2.729021 |
| Ir | -1.299823 | 0.079150  | -0.071507 |
| C  | 2.143697  | 0.073832  | 0.105467  |
| C  | 3.472449  | 0.783569  | -0.236435 |
| H  | 2.115033  | -0.912912 | -0.384555 |
| H  | 2.110938  | -0.105568 | 1.193505  |
| H  | 3.508362  | 0.979570  | -1.322706 |
| H  | 3.491574  | 1.773598  | 0.252358  |
| C  | 4.706204  | -0.022031 | 0.183732  |
| C  | 6.029162  | 0.674586  | -0.150334 |
| H  | 4.679775  | -1.012902 | -0.306310 |
| H  | 4.659569  | -0.220709 | 1.270290  |
| C  | 7.267984  | -0.129601 | 0.255481  |
| H  | 6.067446  | 0.882039  | -1.235664 |
| H  | 6.055160  | 1.662457  | 0.345168  |
| C  | 8.591602  | 0.567590  | -0.075725 |
| H  | 7.228054  | -0.339748 | 1.340634  |
| H  | 7.241674  | -1.117101 | -0.242096 |
| H  | 8.627282  | 0.780147  | -1.159731 |



|   |           |           |           |
|---|-----------|-----------|-----------|
| H | 8.616248  | 1.553164  | 0.423543  |
| C | 9.824541  | -0.241860 | 0.327719  |
| H | 9.848478  | -1.218750 | -0.183519 |
| H | 10.755445 | 0.288449  | 0.073293  |
| H | 9.839620  | -0.437056 | 1.413022  |

M4

|                                     |                     |         |         |
|-------------------------------------|---------------------|---------|---------|
| B3LYP SCF energy:                   | -1094.12196957 a.u. |         |         |
| B3LYP enthalpy:                     | -1093.544694 a.u.   |         |         |
| B3LYP free energy:                  | -1093.640528 a.u.   |         |         |
| B3LYP-D3BJ SCF energy in solution:  | -1095.43842147 a.u. |         |         |
| B3LYP-D3BJ enthalpy in solution:    | -1094.861146 a.u.   |         |         |
| B3LYP-D3BJ free energy in solution: | -1094.956980 a.u.   |         |         |
| Three lowest frequencies (cm-1):    | 19.9783             | 24.2115 | 39.9785 |

Cartesian coordinates

| ATOM | X         | Y         | Z         |
|------|-----------|-----------|-----------|
| C    | -0.377239 | -1.153591 | -1.914483 |
| C    | 0.556382  | -0.761015 | -0.969922 |
| C    | 1.060056  | 0.686565  | -0.889111 |
| H    | 1.013006  | -1.504164 | -0.308854 |
| C    | -0.361684 | 2.651592  | -0.042591 |
| C    | 0.642828  | 3.661041  | -0.558049 |
| H    | 0.109178  | 4.602461  | -0.743246 |
| H    | 1.396245  | 3.859516  | 0.221437  |
| H    | 1.166107  | 3.341951  | -1.469472 |
| C    | -2.955004 | 0.093888  | 1.479303  |
| C    | -3.597001 | 0.434286  | 0.252878  |
| C    | -3.563715 | -0.753380 | -0.607795 |
| C    | -2.971583 | -1.835448 | 0.130161  |
| C    | -2.535783 | -1.310939 | 1.393074  |
| C    | -4.237006 | 1.742863  | -0.072392 |
| H    | -5.205759 | 1.822098  | 0.451039  |
| H    | -3.601622 | 2.578440  | 0.254178  |
| H    | -4.428869 | 1.848340  | -1.148399 |
| C    | -2.809372 | 0.978976  | 2.674910  |
| H    | -3.732468 | 0.935136  | 3.279456  |
| H    | -1.977227 | 0.660747  | 3.317552  |
| H    | -2.634114 | 2.019933  | 2.375246  |
| C    | -1.903742 | -2.088199 | 2.502594  |
| H    | -2.687094 | -2.450547 | 3.191820  |
| H    | -1.357974 | -2.966088 | 2.131529  |
| H    | -1.210574 | -1.471195 | 3.090825  |
| C    | -2.852580 | -3.261330 | -0.317358 |
| H    | -3.702536 | -3.848166 | 0.070140  |
| H    | -2.867086 | -3.354021 | -1.411956 |
| H    | -1.933319 | -3.735473 | 0.054948  |
| C    | -4.189669 | -0.841611 | -1.962958 |
| H    | -5.272771 | -1.029824 | -1.860927 |

|    |           |           |           |
|----|-----------|-----------|-----------|
| H  | -4.071580 | 0.093296  | -2.528336 |
| H  | -3.767637 | -1.662191 | -2.558286 |
| H  | -0.631223 | -0.505033 | -2.759692 |
| O  | -1.347681 | 2.999108  | 0.579365  |
| N  | -0.158765 | 1.290171  | -0.325858 |
| Ir | -1.465055 | -0.164642 | -0.162125 |
| H  | -0.656031 | -2.204963 | -2.012921 |
| H  | 1.276380  | 1.086442  | -1.898464 |
| C  | 2.316603  | 0.809511  | -0.015163 |
| C  | 3.560896  | 0.179560  | -0.652406 |
| H  | 2.108162  | 0.345075  | 0.965092  |
| H  | 2.517014  | 1.872405  | 0.185594  |
| H  | 3.368662  | -0.883533 | -0.888018 |
| H  | 3.760765  | 0.669214  | -1.622840 |
| C  | 4.807097  | 0.279486  | 0.233983  |
| C  | 6.062536  | -0.329513 | -0.397429 |
| H  | 4.605646  | -0.215954 | 1.201659  |
| H  | 4.996808  | 1.341514  | 0.475312  |
| C  | 7.304246  | -0.241759 | 0.494859  |
| H  | 5.867390  | -1.388685 | -0.648982 |
| H  | 6.267224  | 0.174181  | -1.360200 |
| C  | 8.563333  | -0.846074 | -0.134875 |
| H  | 7.496496  | 0.817126  | 0.749712  |
| H  | 7.098676  | -0.747951 | 1.456603  |
| H  | 8.367360  | -1.902521 | -0.394305 |
| H  | 8.769587  | -0.335961 | -1.093395 |
| C  | 9.796379  | -0.760812 | 0.765444  |
| H  | 9.636744  | -1.295120 | 1.716895  |
| H  | 10.680659 | -1.203279 | 0.280746  |
| H  | 10.041933 | 0.285588  | 1.012215  |

M5

|                                     |                                   |
|-------------------------------------|-----------------------------------|
| B3LYP SCF energy:                   | -1094.12494996 a.u.               |
| B3LYP enthalpy:                     | -1093.547276 a.u.                 |
| B3LYP free energy:                  | -1093.644034 a.u.                 |
| B3LYP-D3BJ SCF energy in solution:  | -1095.44198876 a.u.               |
| B3LYP-D3BJ enthalpy in solution:    | -1094.864315 a.u.                 |
| B3LYP-D3BJ free energy in solution: | -1094.961073 a.u.                 |
| Three lowest frequencies (cm-1):    | 15.9245      22.6644      34.8380 |

Cartesian coordinates

| ATOM | X         | Y         | Z         |
|------|-----------|-----------|-----------|
| C    | 0.901433  | 0.936196  | 0.224577  |
| C    | 0.232913  | 1.546943  | -0.817968 |
| C    | -0.762073 | 2.672708  | -0.558561 |
| H    | 0.515387  | 1.319165  | -1.851597 |
| C    | -3.154565 | 2.466096  | 0.221038  |
| C    | -1.857842 | -1.833272 | -1.144104 |
| C    | -3.030147 | -1.354816 | -0.403466 |

|    |           |           |           |
|----|-----------|-----------|-----------|
| C  | -2.700477 | -1.372405 | 0.987336  |
| C  | -1.322823 | -1.860626 | 1.109335  |
| C  | -0.842471 | -2.203226 | -0.198379 |
| C  | -4.359769 | -1.012351 | -0.993573 |
| H  | -5.029239 | -1.887233 | -0.919082 |
| H  | -4.277166 | -0.747675 | -2.056405 |
| H  | -4.823126 | -0.171640 | -0.461120 |
| C  | -1.801311 | -2.045126 | -2.622705 |
| H  | -2.242821 | -3.025833 | -2.874271 |
| H  | -0.769203 | -2.041046 | -2.998008 |
| H  | -2.371627 | -1.279728 | -3.166912 |
| C  | 0.438456  | -2.906822 | -0.527851 |
| H  | 0.243029  | -3.987569 | -0.635205 |
| H  | 1.193105  | -2.789774 | 0.259325  |
| H  | 0.873985  | -2.559280 | -1.475009 |
| C  | -0.617420 | -2.099293 | 2.406414  |
| H  | -0.923198 | -3.075873 | 2.821088  |
| H  | -0.868115 | -1.334035 | 3.154235  |
| H  | 0.473761  | -2.120481 | 2.285167  |
| C  | -3.618698 | -1.036883 | 2.115719  |
| H  | -4.294361 | -1.889117 | 2.306776  |
| H  | -4.229075 | -0.156947 | 1.872566  |
| H  | -3.067816 | -0.834105 | 3.043756  |
| H  | 0.746464  | 1.341977  | 1.233796  |
| N  | -1.905954 | 1.905635  | -0.081343 |
| H  | -0.390815 | 3.404849  | 0.181670  |
| H  | -0.979590 | 3.220330  | -1.490590 |
| Ir | -1.340248 | 0.025002  | -0.083451 |
| C  | 2.095784  | 0.043348  | 0.058158  |
| C  | 3.411936  | 0.846563  | 0.155732  |
| H  | 2.053220  | -0.473143 | -0.913480 |
| H  | 2.099147  | -0.729693 | 0.842698  |
| H  | 3.430367  | 1.605023  | -0.646405 |
| H  | 3.432662  | 1.407122  | 1.107206  |
| C  | 4.654689  | -0.044598 | 0.057384  |
| C  | 5.972591  | 0.734591  | 0.108042  |
| H  | 4.611067  | -0.628912 | -0.880254 |
| H  | 4.635563  | -0.786545 | 0.876829  |
| C  | 7.214485  | -0.158743 | 0.029508  |
| H  | 5.994826  | 1.466725  | -0.720033 |
| H  | 6.008736  | 1.331227  | 1.038113  |
| C  | 8.536475  | 0.614818  | 0.064869  |
| H  | 7.194425  | -0.884736 | 0.863656  |
| H  | 7.171123  | -0.764003 | -0.895297 |
| H  | 8.556354  | 1.336151  | -0.772194 |
| H  | 8.575116  | 1.223989  | 0.986209  |
| C  | 9.770313  | -0.285669 | -0.005676 |
| H  | 9.780569  | -0.881159 | -0.933887 |
| H  | 10.700593 | 0.302843  | 0.021007  |
| H  | 9.800147  | -0.992647 | 0.840166  |
| O  | -4.079685 | 1.758744  | 0.572720  |

|   |           |          |           |
|---|-----------|----------|-----------|
| C | -3.279292 | 3.969431 | 0.097176  |
| H | -4.285136 | 4.265712 | 0.417348  |
| H | -2.530689 | 4.486890 | 0.717861  |
| H | -3.122509 | 4.293469 | -0.944395 |

TS5

|                                     |                     |         |         |
|-------------------------------------|---------------------|---------|---------|
| B3LYP SCF energy:                   | -1323.05168354 a.u. |         |         |
| B3LYP enthalpy:                     | -1322.409217 a.u.   |         |         |
| B3LYP free energy:                  | -1322.514932 a.u.   |         |         |
| B3LYP-D3BJ SCF energy in solution:  | -1324.64841339 a.u. |         |         |
| B3LYP-D3BJ enthalpy in solution:    | -1324.005947 a.u.   |         |         |
| B3LYP-D3BJ free energy in solution: | -1324.111662 a.u.   |         |         |
| Three lowest frequencies (cm-1):    | -754.6750           | 17.2708 | 22.4369 |
| Imaginary frequency:                | -754.6750 cm-1      |         |         |

Cartesian coordinates

| ATOM | X         | Y         | Z         |
|------|-----------|-----------|-----------|
| C    | -0.778170 | -2.258465 | 0.524567  |
| C    | -1.344127 | -1.550971 | 1.646680  |
| C    | -2.693111 | -1.186367 | 1.308739  |
| C    | -3.003301 | -1.786489 | 0.007228  |
| C    | -1.828944 | -2.433725 | -0.477081 |
| C    | 0.553141  | -2.945759 | 0.503236  |
| H    | 0.936709  | -3.076192 | -0.518197 |
| H    | 1.308836  | -2.404961 | 1.088906  |
| C    | -0.671073 | -1.296771 | 2.955634  |
| H    | 0.423508  | -1.292562 | 2.863612  |
| H    | -0.939739 | -2.106911 | 3.656559  |
| H    | -0.989017 | -0.342644 | 3.392242  |
| C    | -3.674409 | -0.492572 | 2.201119  |
| H    | -3.173522 | 0.245359  | 2.840343  |
| H    | -4.187482 | -1.226069 | 2.846931  |
| H    | -4.441872 | 0.030699  | 1.615234  |
| C    | -4.342883 | -1.730647 | -0.652051 |
| H    | -4.726973 | -0.700917 | -0.674695 |
| H    | -5.059710 | -2.347378 | -0.084253 |
| H    | -4.311600 | -2.109235 | -1.681805 |
| C    | -1.704492 | -3.249237 | -1.727181 |
| H    | -2.438610 | -2.950627 | -2.487267 |
| H    | -1.877355 | -4.314454 | -1.496720 |
| H    | -0.701729 | -3.174074 | -2.171016 |
| H    | 0.455494  | -3.953853 | 0.942294  |
| C    | -0.527916 | 0.182318  | -2.284339 |
| C    | 0.522641  | 0.063594  | -1.377306 |
| H    | -0.748984 | -0.634905 | -2.974734 |
| H    | -0.897304 | 1.166110  | -2.580948 |
| H    | 1.131962  | -0.843692 | -1.366470 |
| C    | 1.004994  | 1.242329  | -0.525729 |
| H    | 1.248523  | 2.113105  | -1.162269 |

|    |           |           |           |
|----|-----------|-----------|-----------|
| C  | 2.242795  | 0.864921  | 0.295724  |
| H  | 2.030761  | -0.060453 | 0.860521  |
| H  | 2.447364  | 1.642975  | 1.043745  |
| N  | -0.244020 | 1.506275  | 0.258893  |
| C  | -0.266351 | 2.108581  | 1.553134  |
| O  | -1.104352 | 1.772980  | 2.358275  |
| C  | 0.661817  | 3.278511  | 1.811124  |
| H  | 1.371376  | 3.015110  | 2.610979  |
| H  | 0.045159  | 4.105614  | 2.193260  |
| H  | 1.217439  | 3.617307  | 0.927936  |
| Ir | -1.394689 | -0.252880 | -0.241159 |
| C  | -2.881085 | 2.345105  | -1.074810 |
| O  | -2.954534 | 1.093665  | -0.860051 |
| O  | -1.808963 | 3.007672  | -0.959882 |
| C  | -4.139762 | 3.069457  | -1.466651 |
| H  | -3.903592 | 3.852947  | -2.199700 |
| H  | -4.545891 | 3.567712  | -0.570752 |
| H  | -4.893267 | 2.377200  | -1.861018 |
| H  | -0.959393 | 2.299450  | -0.380781 |
| C  | 3.497062  | 0.687447  | -0.570213 |
| C  | 4.747780  | 0.319129  | 0.235125  |
| H  | 3.684393  | 1.625487  | -1.123490 |
| H  | 3.326264  | -0.083512 | -1.343509 |
| C  | 6.008981  | 0.190032  | -0.624414 |
| H  | 4.914245  | 1.082478  | 1.017254  |
| H  | 4.571000  | -0.629643 | 0.775302  |
| H  | 5.840855  | -0.572038 | -1.408136 |
| H  | 6.177924  | 1.140427  | -1.163512 |
| C  | 7.267195  | -0.169980 | 0.170823  |
| C  | 8.529376  | -0.281975 | -0.690452 |
| H  | 7.102788  | -1.125131 | 0.704052  |
| H  | 7.429770  | 0.588468  | 0.959162  |
| C  | 9.783561  | -0.639086 | 0.107949  |
| H  | 8.364211  | -1.038996 | -1.478778 |
| H  | 8.689722  | 0.673346  | -1.222510 |
| H  | 9.998399  | 0.120140  | 0.878316  |
| H  | 9.670305  | -1.608091 | 0.622249  |
| H  | 10.668711 | -0.710558 | -0.543185 |

TS6

|                                     |                     |        |         |
|-------------------------------------|---------------------|--------|---------|
| B3LYP SCF energy:                   | -1323.05624031 a.u. |        |         |
| B3LYP enthalpy:                     | -1322.412643 a.u.   |        |         |
| B3LYP free energy:                  | -1322.524908 a.u.   |        |         |
| B3LYP-D3BJ SCF energy in solution:  | -1324.64401797 a.u. |        |         |
| B3LYP-D3BJ enthalpy in solution:    | -1324.000421 a.u.   |        |         |
| B3LYP-D3BJ free energy in solution: | -1324.112686 a.u.   |        |         |
| Three lowest frequencies (cm-1):    | -95.0642            | 9.7258 | 17.8209 |
| Imaginary frequency:                | -95.0642 cm-1       |        |         |

## Cartesian coordinates

| ATOM | X         | Y         | Z         |
|------|-----------|-----------|-----------|
| C    | -0.805133 | 2.128546  | -0.379784 |
| C    | 3.250515  | -1.816292 | -1.025101 |
| C    | 1.828916  | -1.893168 | -1.199594 |
| C    | 1.207582  | -2.098679 | 0.114072  |
| C    | 2.246819  | -2.106960 | 1.093458  |
| C    | 3.523460  | -1.885526 | 0.405622  |
| C    | 1.094096  | -1.859501 | -2.501773 |
| H    | 0.933581  | -2.889428 | -2.865189 |
| H    | 1.655956  | -1.315720 | -3.272639 |
| H    | 0.107121  | -1.387291 | -2.401034 |
| C    | 4.287652  | -1.656140 | -2.089920 |
| H    | 4.808297  | -2.615153 | -2.250309 |
| H    | 5.036731  | -0.905170 | -1.802350 |
| H    | 3.846508  | -1.346939 | -3.046334 |
| C    | 4.876678  | -1.893713 | 1.040082  |
| H    | 5.264354  | -2.926848 | 1.080791  |
| H    | 4.844948  | -1.506703 | 2.067732  |
| H    | 5.592118  | -1.287891 | 0.468080  |
| C    | 2.088605  | -2.313597 | 2.565003  |
| H    | 2.298067  | -3.368194 | 2.814381  |
| H    | 1.069225  | -2.085113 | 2.902636  |
| H    | 2.788735  | -1.690870 | 3.139156  |
| C    | -0.242377 | -2.377737 | 0.359941  |
| H    | -0.410026 | -3.468273 | 0.388739  |
| H    | -0.877603 | -1.970632 | -0.437195 |
| H    | -0.585947 | -1.963457 | 1.317567  |
| Ir   | 2.311257  | -0.190484 | 0.060064  |
| H    | -1.045835 | 3.141249  | -0.012207 |
| N    | 0.524232  | 1.703712  | 0.113210  |
| C    | 0.863553  | 1.739910  | 1.432164  |
| C    | 0.052696  | 2.430303  | 2.479029  |
| H    | -0.105454 | 3.485727  | 2.205626  |
| H    | 0.562223  | 2.364687  | 3.447497  |
| H    | -0.942024 | 1.961366  | 2.545025  |
| O    | 1.927143  | 1.142485  | 1.736674  |
| O    | 3.678436  | 1.220223  | -0.638626 |
| C    | 3.467247  | 2.410521  | -1.089231 |
| O    | 2.339444  | 2.931486  | -1.178897 |
| C    | 4.696167  | 3.180701  | -1.502941 |
| H    | 5.391329  | 2.533854  | -2.055656 |
| H    | 4.412935  | 4.052702  | -2.104744 |
| H    | 5.217657  | 3.526139  | -0.595337 |
| H    | 1.334444  | 2.186650  | -0.502295 |
| C    | -1.914766 | 1.170425  | -0.048764 |
| C    | -3.068583 | 1.506568  | 0.544887  |
| H    | -1.758865 | 0.131518  | -0.362589 |
| H    | -3.223638 | 2.555358  | 0.836716  |
| H    | -0.692329 | 2.215864  | -1.472873 |
| C    | -4.211582 | 0.572616  | 0.817557  |

|   |            |           |           |
|---|------------|-----------|-----------|
| C | -5.497495  | 0.933686  | 0.051156  |
| H | -4.434795  | 0.587679  | 1.900853  |
| H | -3.914327  | -0.462286 | 0.574275  |
| C | -6.665002  | -0.007974 | 0.361335  |
| H | -5.787199  | 1.972887  | 0.290833  |
| H | -5.286372  | 0.920879  | -1.032993 |
| H | -6.362799  | -1.048049 | 0.137058  |
| H | -6.872768  | 0.015439  | 1.447158  |
| C | -7.947523  | 0.321399  | -0.408232 |
| C | -9.110001  | -0.627087 | -0.100065 |
| H | -7.736869  | 0.300781  | -1.493651 |
| H | -8.252438  | 1.359915  | -0.182254 |
| C | -10.394138 | -0.307826 | -0.872076 |
| H | -8.801452  | -1.666141 | -0.321503 |
| H | -9.322044  | -0.603823 | 0.985264  |
| C | -11.547021 | -1.262581 | -0.559461 |
| H | -10.702647 | 0.729735  | -0.649072 |
| H | -10.179994 | -0.329531 | -1.956242 |
| H | -12.452153 | -1.003964 | -1.131132 |
| H | -11.284004 | -2.304637 | -0.807547 |
| H | -11.811448 | -1.235966 | 0.510938  |

1a

|                                     |                                   |
|-------------------------------------|-----------------------------------|
| B3LYP SCF energy:                   | -392.81982119 a.u.                |
| B3LYP enthalpy:                     | -392.527676 a.u.                  |
| B3LYP free energy:                  | -392.583341 a.u.                  |
| B3LYP-D3BJ SCF energy in solution:  | -393.30265399 a.u.                |
| B3LYP-D3BJ enthalpy in solution:    | -393.010509 a.u.                  |
| B3LYP-D3BJ free energy in solution: | -393.066174 a.u.                  |
| Three lowest frequencies (cm-1):    | 26.9319      40.5096      66.3355 |

Cartesian coordinates

| ATOM | X         | Y         | Z         |
|------|-----------|-----------|-----------|
| C    | -3.506958 | 0.687954  | -0.401263 |
| C    | -3.998381 | -0.718578 | -0.188300 |
| C    | -5.083332 | -1.056918 | 0.515180  |
| H    | -3.405459 | -1.518889 | -0.649647 |
| H    | -5.714563 | -0.299760 | 0.993675  |
| H    | -5.386212 | -2.100788 | 0.637833  |
| H    | -3.442430 | 0.886196  | -1.488379 |
| C    | -2.133823 | 0.993524  | 0.230881  |
| C    | -0.957347 | 0.210628  | -0.361570 |
| H    | -2.190017 | 0.806401  | 1.318379  |
| H    | -1.934549 | 2.074355  | 0.117410  |
| H    | -1.120382 | -0.873468 | -0.225799 |
| H    | -0.924027 | 0.375559  | -1.455100 |
| C    | 0.396458  | 0.588368  | 0.247734  |
| C    | 1.579380  | -0.186998 | -0.339783 |
| H    | 0.361072  | 0.426493  | 1.341189  |

|   |           |           |           |
|---|-----------|-----------|-----------|
| H | 0.567810  | 1.672727  | 0.112626  |
| C | 2.933211  | 0.190181  | 0.268538  |
| H | 1.408067  | -1.271262 | -0.203935 |
| H | 1.613642  | -0.025762 | -1.433538 |
| C | 4.116902  | -0.584342 | -0.319530 |
| H | 3.104875  | 1.274674  | 0.133380  |
| H | 2.899925  | 0.028335  | 1.362371  |
| H | 3.944482  | -1.667732 | -0.183577 |
| H | 4.148711  | -0.422558 | -1.412596 |
| C | 5.464937  | -0.201144 | 0.292783  |
| H | 6.291882  | -0.776723 | -0.153203 |
| H | 5.684851  | 0.869052  | 0.140601  |
| H | 5.479045  | -0.387167 | 1.379994  |
| H | -4.253005 | 1.394269  | 0.000297  |

3a

|                                     |                                   |
|-------------------------------------|-----------------------------------|
| B3LYP SCF energy:                   | -600.67150510 a.u.                |
| B3LYP enthalpy:                     | -600.319533 a.u.                  |
| B3LYP free energy:                  | -600.385477 a.u.                  |
| B3LYP-D3BJ SCF energy in solution:  | -601.41704947 a.u.                |
| B3LYP-D3BJ enthalpy in solution:    | -601.065077 a.u.                  |
| B3LYP-D3BJ free energy in solution: | -601.131021 a.u.                  |
| Three lowest frequencies (cm-1):    | 29.2187      38.8795      50.5646 |

Cartesian coordinates

| ATOM | X         | Y         | Z         |
|------|-----------|-----------|-----------|
| C    | 2.129691  | 0.493530  | -0.774549 |
| C    | 2.504807  | 1.843522  | -0.186321 |
| C    | 1.925601  | 2.486188  | 0.831447  |
| H    | 3.361459  | 2.311485  | -0.687283 |
| H    | 2.291907  | 3.463210  | 1.158326  |
| H    | 1.072566  | 2.077373  | 1.379813  |
| H    | 1.865089  | 0.697991  | -1.827842 |
| C    | 4.108284  | -0.963566 | 0.066602  |
| O    | 5.067880  | -1.636986 | -0.268990 |
| C    | 3.738947  | -0.775814 | 1.528043  |
| H    | 4.608038  | -1.067134 | 2.130872  |
| H    | 3.442345  | 0.255030  | 1.765167  |
| H    | 2.898952  | -1.439942 | 1.788225  |
| N    | 3.309249  | -0.377312 | -0.889132 |
| C    | 0.902283  | -0.200415 | -0.149616 |
| H    | 0.968597  | -0.176027 | 0.950886  |
| H    | 0.947619  | -1.264720 | -0.433951 |
| H    | 3.629519  | -0.595282 | -1.827619 |
| C    | -0.445727 | 0.376776  | -0.600848 |
| C    | -1.646873 | -0.310129 | 0.056124  |
| H    | -0.528085 | 0.280459  | -1.699426 |
| H    | -0.485266 | 1.459768  | -0.392928 |
| C    | -3.001868 | 0.223661  | -0.417840 |



|   |           |           |           |
|---|-----------|-----------|-----------|
| H | -1.595263 | -1.398030 | -0.135824 |
| H | -1.574991 | -0.198188 | 1.154160  |
| H | -3.049826 | 1.313132  | -0.233270 |
| H | -3.077177 | 0.103512  | -1.514764 |
| C | -4.201757 | -0.455476 | 0.248502  |
| C | -5.558822 | 0.070782  | -0.229136 |
| H | -4.128840 | -0.331101 | 1.345354  |
| H | -4.150405 | -1.545755 | 0.068516  |
| C | -6.750698 | -0.611576 | 0.443630  |
| H | -5.608193 | 1.160582  | -0.050735 |
| H | -5.631165 | -0.055684 | -1.324900 |
| H | -7.708662 | -0.210374 | 0.075944  |
| H | -6.750311 | -1.698132 | 0.253523  |
| H | -6.728887 | -0.470003 | 1.537375  |

4a

|                                     |                                   |
|-------------------------------------|-----------------------------------|
| B3LYP SCF energy:                   | -600.68194004 a.u.                |
| B3LYP enthalpy:                     | -600.329875 a.u.                  |
| B3LYP free energy:                  | -600.397023 a.u.                  |
| B3LYP-D3BJ SCF energy in solution:  | -601.42545405 a.u.                |
| B3LYP-D3BJ enthalpy in solution:    | -601.073389 a.u.                  |
| B3LYP-D3BJ free energy in solution: | -601.140537 a.u.                  |
| Three lowest frequencies (cm-1):    | 21.6365      30.4338      41.7643 |

Cartesian coordinates

| ATOM | X         | Y         | Z         |
|------|-----------|-----------|-----------|
| C    | 5.454717  | 0.320724  | -0.182745 |
| H    | 5.166235  | -1.507918 | -0.947878 |
| N    | 4.792291  | -0.882266 | -0.240595 |
| C    | 4.936837  | 1.336905  | 0.822607  |
| H    | 3.880272  | 1.584000  | 0.636823  |
| H    | 5.012648  | 0.949902  | 1.852063  |
| H    | 5.549494  | 2.241990  | 0.734130  |
| O    | 6.421415  | 0.538968  | -0.891602 |
| C    | 3.553692  | -1.261131 | 0.426058  |
| H    | 3.536517  | -2.364687 | 0.459507  |
| H    | 3.572256  | -0.928416 | 1.476194  |
| C    | 2.299550  | -0.759889 | -0.249431 |
| C    | 1.324901  | -0.072076 | 0.358115  |
| H    | 2.209672  | -0.994309 | -1.318677 |
| H    | 1.433460  | 0.154869  | 1.428912  |
| C    | 0.057825  | 0.411426  | -0.288909 |
| H    | 0.083867  | 0.190487  | -1.369882 |
| H    | 0.005385  | 1.513277  | -0.198759 |
| C    | -1.215524 | -0.187694 | 0.332673  |
| C    | -2.508100 | 0.349626  | -0.288187 |
| H    | -1.220530 | 0.013518  | 1.419942  |
| H    | -1.182943 | -1.287353 | 0.230792  |
| C    | -3.781518 | -0.246041 | 0.319388  |

|   |           |           |           |
|---|-----------|-----------|-----------|
| H | -2.532533 | 1.450194  | -0.181470 |
| H | -2.497922 | 0.155851  | -1.376923 |
| H | -3.759036 | -1.346080 | 0.207263  |
| H | -3.788273 | -0.057421 | 1.409195  |
| C | -5.074337 | 0.298369  | -0.295143 |
| C | -6.349616 | -0.296965 | 0.309900  |
| H | -5.067274 | 0.111678  | -1.385446 |
| H | -5.097027 | 1.398524  | -0.181646 |
| C | -7.635556 | 0.254850  | -0.307166 |
| H | -6.326846 | -1.396056 | 0.194183  |
| H | -6.354191 | -0.111862 | 1.399672  |
| H | -8.530946 | -0.194746 | 0.151134  |
| H | -7.707333 | 1.347559  | -0.174494 |
| H | -7.679534 | 0.052498  | -1.390618 |

TS3a1

|                                     |                                     |
|-------------------------------------|-------------------------------------|
| B3LYP SCF energy:                   | -1100.24054743 a.u.                 |
| B3LYP enthalpy:                     | -1099.666613 a.u.                   |
| B3LYP free energy:                  | -1099.763869 a.u.                   |
| B3LYP-D3BJ SCF energy in solution:  | -1101.57600217 a.u.                 |
| B3LYP-D3BJ enthalpy in solution:    | -1101.002068 a.u.                   |
| B3LYP-D3BJ free energy in solution: | -1101.099324 a.u.                   |
| Three lowest frequencies (cm-1):    | -164.7834      16.5737      21.5108 |
| Imaginary frequency:                | -164.7834 cm-1                      |

Cartesian coordinates

| ATOM | X         | Y         | Z         |
|------|-----------|-----------|-----------|
| C    | -1.290242 | -0.715115 | -2.588989 |
| C    | -0.168173 | -0.908855 | -1.772523 |
| C    | 0.671364  | 0.175804  | -1.349902 |
| H    | 0.061046  | -1.904429 | -1.376932 |
| C    | -0.886946 | 2.706442  | -0.140134 |
| C    | -1.660454 | 3.948309  | -0.545322 |
| H    | -2.005909 | 4.462467  | 0.363407  |
| H    | -0.972770 | 4.627473  | -1.075183 |
| H    | -2.507712 | 3.728067  | -1.210281 |
| C    | -1.902601 | -0.495862 | 1.751126  |
| C    | -2.994563 | 0.316728  | 1.308058  |
| C    | -3.744724 | -0.450266 | 0.317707  |
| C    | -3.123170 | -1.746620 | 0.189117  |
| C    | -1.976213 | -1.765417 | 1.043295  |
| C    | -3.376807 | 1.649092  | 1.872866  |
| H    | -4.023576 | 1.505492  | 2.755786  |
| H    | -2.494004 | 2.217102  | 2.196787  |
| H    | -3.937632 | 2.258323  | 1.151157  |
| C    | -0.905244 | -0.107641 | 2.795222  |
| H    | -1.372483 | -0.149842 | 3.794492  |
| H    | -0.038292 | -0.780958 | 2.807839  |
| H    | -0.543339 | 0.918440  | 2.631448  |

|    |           |           |           |
|----|-----------|-----------|-----------|
| C  | -1.066705 | -2.933164 | 1.269084  |
| H  | -1.422259 | -3.517715 | 2.135454  |
| H  | -1.043467 | -3.614447 | 0.407351  |
| H  | -0.037352 | -2.620205 | 1.493574  |
| C  | -3.635687 | -2.885329 | -0.639494 |
| H  | -4.326684 | -3.504310 | -0.041630 |
| H  | -4.191653 | -2.535093 | -1.520016 |
| H  | -2.827323 | -3.544850 | -0.985093 |
| C  | -5.022467 | -0.019012 | -0.327961 |
| H  | -5.874735 | -0.296557 | 0.317753  |
| H  | -5.061283 | 1.068992  | -0.473773 |
| H  | -5.176215 | -0.502917 | -1.302053 |
| H  | -1.406640 | 0.203440  | -3.165613 |
| O  | -0.092883 | 2.689630  | 0.797602  |
| N  | -1.071015 | 1.633968  | -0.969112 |
| H  | -1.883780 | -1.574785 | -2.906409 |
| H  | 0.766550  | 1.021662  | -2.030604 |
| Rh | -1.730322 | -0.072676 | -0.448549 |
| C  | 1.737375  | 0.046882  | -0.320174 |
| C  | 3.141325  | 0.003832  | -0.972407 |
| H  | 1.574870  | -0.848445 | 0.301996  |
| H  | 1.678798  | 0.928680  | 0.340032  |
| H  | 3.201329  | -0.847445 | -1.673186 |
| H  | 3.284307  | 0.914617  | -1.579654 |
| C  | 4.262246  | -0.102264 | 0.067554  |
| C  | 5.663307  | -0.110559 | -0.551757 |
| H  | 4.119503  | -1.020301 | 0.666715  |
| H  | 4.176706  | 0.740091  | 0.777554  |
| C  | 6.788443  | -0.221316 | 0.481845  |
| H  | 5.741492  | -0.947741 | -1.269742 |
| H  | 5.802899  | 0.810451  | -1.146947 |
| C  | 8.192404  | -0.215542 | -0.131659 |
| H  | 6.702982  | 0.611365  | 1.204616  |
| H  | 6.651969  | -1.146357 | 1.072681  |
| H  | 8.275025  | -1.046386 | -0.855815 |
| H  | 8.325806  | 0.709758  | -0.721002 |
| C  | 9.310521  | -0.326806 | 0.905405  |
| H  | 10.303424 | -0.317457 | 0.429393  |
| H  | 9.277984  | 0.510657  | 1.622181  |
| H  | 9.229130  | -1.261134 | 1.485640  |

TS4a1

|                                     |                                     |
|-------------------------------------|-------------------------------------|
| B3LYP SCF energy:                   | -1100.23585378 a.u.                 |
| B3LYP enthalpy:                     | -1099.661830 a.u.                   |
| B3LYP free energy:                  | -1099.759452 a.u.                   |
| B3LYP-D3BJ SCF energy in solution:  | -1101.57285980 a.u.                 |
| B3LYP-D3BJ enthalpy in solution:    | -1100.998836 a.u.                   |
| B3LYP-D3BJ free energy in solution: | -1101.096458 a.u.                   |
| Three lowest frequencies (cm-1):    | -246.8541      13.6832      24.4124 |

Imaginary frequency:

-246.8541 cm<sup>-1</sup>

Cartesian coordinates

| ATOM | X         | Y         | Z         |
|------|-----------|-----------|-----------|
| C    | 0.863800  | 0.789048  | -0.431614 |
| C    | 0.106431  | 0.540480  | -1.572688 |
| C    | -0.994259 | 1.376494  | -1.974501 |
| H    | 0.293775  | -0.373666 | -2.147283 |
| C    | -2.955548 | 2.581120  | 0.145659  |
| C    | -3.078407 | 3.466604  | 1.375615  |
| H    | -4.099741 | 3.375764  | 1.772944  |
| H    | -2.928620 | 4.512531  | 1.062255  |
| H    | -2.339432 | 3.228542  | 2.153632  |
| C    | -3.268266 | -1.186352 | -0.534929 |
| C    | -3.272082 | -0.808001 | 0.850766  |
| C    | -2.080156 | -1.375158 | 1.465522  |
| C    | -1.371005 | -2.129033 | 0.461384  |
| C    | -2.080473 | -1.990753 | -0.775231 |
| C    | -4.382095 | -0.092191 | 1.553403  |
| H    | -5.146693 | -0.822042 | 1.871503  |
| H    | -4.871463 | 0.637127  | 0.893304  |
| H    | -4.031752 | 0.430679  | 2.453715  |
| C    | -4.339100 | -0.855720 | -1.524323 |
| H    | -5.216380 | -1.503900 | -1.353313 |
| H    | -4.007497 | -1.016824 | -2.558784 |
| H    | -4.661141 | 0.190928  | -1.423222 |
| C    | -1.739724 | -2.658527 | -2.072039 |
| H    | -2.304226 | -3.602413 | -2.164903 |
| H    | -0.672679 | -2.910315 | -2.141827 |
| H    | -2.006331 | -2.038650 | -2.939878 |
| C    | -0.150239 | -2.961213 | 0.702205  |
| H    | -0.444745 | -3.953732 | 1.085033  |
| H    | 0.515611  | -2.508523 | 1.449914  |
| H    | 0.427400  | -3.124205 | -0.217277 |
| C    | -1.728196 | -1.301817 | 2.917193  |
| H    | -2.201805 | -2.141473 | 3.456441  |
| H    | -2.084602 | -0.371229 | 3.379360  |
| H    | -0.644473 | -1.375767 | 3.080982  |
| H    | 0.732560  | 1.753954  | 0.065708  |
| O    | -3.824752 | 2.500053  | -0.713591 |
| N    | -1.739675 | 1.957053  | 0.050719  |
| H    | -0.914747 | 2.458438  | -1.895976 |
| H    | -1.675380 | 1.020288  | -2.751469 |
| Rh   | -1.496191 | 0.070610  | -0.087379 |
| C    | 2.042372  | -0.030500 | -0.009942 |
| C    | 3.369777  | 0.700394  | -0.319462 |
| H    | 2.033278  | -1.013438 | -0.509108 |
| H    | 1.995553  | -0.216643 | 1.077197  |
| H    | 3.425480  | 0.903837  | -1.403211 |
| H    | 3.363376  | 1.686908  | 0.176605  |
| C    | 4.606223  | -0.089148 | 0.122619  |

|   |           |           |           |
|---|-----------|-----------|-----------|
| C | 5.922486  | 0.637836  | -0.171098 |
| H | 4.610281  | -1.074318 | -0.379047 |
| H | 4.536325  | -0.300604 | 1.205518  |
| C | 7.167934  | -0.144710 | 0.256187  |
| H | 5.982907  | 0.858695  | -1.252713 |
| H | 5.915780  | 1.620200  | 0.335894  |
| C | 8.483157  | 0.586729  | -0.031881 |
| H | 7.105131  | -0.370273 | 1.337155  |
| H | 7.176366  | -1.125562 | -0.254805 |
| H | 8.540770  | 0.815853  | -1.111538 |
| H | 8.472907  | 1.565298  | 0.481557  |
| C | 9.724056  | -0.200275 | 0.391052  |
| H | 9.784057  | -1.168156 | -0.134079 |
| H | 10.648288 | 0.355538  | 0.168739  |
| H | 9.716117  | -0.411925 | 1.473352  |

TS3b

|                                     |                                     |
|-------------------------------------|-------------------------------------|
| B3LYP SCF energy:                   | -1049.94547565 a.u.                 |
| B3LYP enthalpy:                     | -1049.493037 a.u.                   |
| B3LYP free energy:                  | -1049.578454 a.u.                   |
| B3LYP-D3BJ SCF energy in solution:  | -1051.20940772 a.u.                 |
| B3LYP-D3BJ enthalpy in solution:    | -1050.756969 a.u.                   |
| B3LYP-D3BJ free energy in solution: | -1050.842386 a.u.                   |
| Three lowest frequencies (cm-1):    | -148.7020      23.2999      28.5762 |
| Imaginary frequency:                | -148.7020 cm-1                      |

Cartesian coordinates

| ATOM | X         | Y         | Z         |
|------|-----------|-----------|-----------|
| C    | -0.376020 | -0.571351 | -2.507278 |
| C    | 0.739719  | -0.994479 | -1.746400 |
| C    | 1.887462  | -0.141673 | -1.536848 |
| H    | 0.803601  | -2.030115 | -1.401988 |
| C    | 0.790666  | 2.494279  | 0.122750  |
| C    | 0.396000  | 3.895398  | -0.306084 |
| H    | 0.307141  | 4.530989  | 0.586092  |
| H    | 1.193907  | 4.310828  | -0.943637 |
| H    | -0.537198 | 3.908223  | -0.887696 |
| C    | -1.157841 | -0.498873 | 1.751684  |
| C    | -1.974057 | 0.605218  | 1.326201  |
| C    | -2.839755 | 0.116051  | 0.250497  |
| C    | -2.575809 | -1.291928 | 0.060347  |
| C    | -1.522506 | -1.660219 | 0.953369  |
| C    | -2.050572 | 1.949118  | 1.984539  |
| H    | -2.803656 | 1.931175  | 2.790977  |
| H    | -1.087940 | 2.233696  | 2.430497  |
| H    | -2.346193 | 2.735955  | 1.276617  |
| C    | -0.149352 | -0.451849 | 2.856740  |
| H    | -0.661649 | -0.441858 | 3.834485  |
| H    | 0.516558  | -1.324678 | 2.841041  |

|    |           |           |           |
|----|-----------|-----------|-----------|
| H  | 0.472626  | 0.452930  | 2.785118  |
| C  | -0.946128 | -3.033163 | 1.117254  |
| H  | -1.468864 | -3.564907 | 1.930949  |
| H  | -1.057638 | -3.639317 | 0.207755  |
| H  | 0.119336  | -3.001187 | 1.385782  |
| C  | -3.322125 | -2.203446 | -0.866526 |
| H  | -4.198239 | -2.632370 | -0.350590 |
| H  | -3.694598 | -1.671813 | -1.753205 |
| H  | -2.703286 | -3.045059 | -1.208652 |
| C  | -3.929607 | 0.899900  | -0.410283 |
| H  | -4.870395 | 0.777188  | 0.154982  |
| H  | -3.700709 | 1.973728  | -0.440066 |
| H  | -4.113935 | 0.560060  | -1.438560 |
| H  | -0.303015 | 0.328514  | -3.121363 |
| O  | 1.473368  | 2.262808  | 1.112280  |
| N  | 0.414788  | 1.497132  | -0.750403 |
| Ir | -0.731485 | 0.031081  | -0.397081 |
| H  | -1.109758 | -1.311413 | -2.833804 |
| H  | 2.014089  | 0.684533  | -2.233767 |
| C  | 3.017751  | -0.424096 | -0.696133 |
| C  | 4.110846  | 0.477272  | -0.726373 |
| C  | 3.100789  | -1.564764 | 0.142613  |
| C  | 5.245675  | 0.245721  | 0.043936  |
| H  | 4.054329  | 1.363360  | -1.363085 |
| C  | 4.237022  | -1.794657 | 0.905598  |
| H  | 2.272630  | -2.273684 | 0.188330  |
| C  | 5.310234  | -0.889583 | 0.859507  |
| H  | 6.081660  | 0.947275  | 0.012509  |
| H  | 4.299467  | -2.679947 | 1.542067  |
| H  | 6.201229  | -1.074963 | 1.464354  |

#### TS4b

|                                     |                                     |
|-------------------------------------|-------------------------------------|
| B3LYP SCF energy:                   | -1049.93747349 a.u.                 |
| B3LYP enthalpy:                     | -1049.484907 a.u.                   |
| B3LYP free energy:                  | -1049.570174 a.u.                   |
| B3LYP-D3BJ SCF energy in solution:  | -1051.20518768 a.u.                 |
| B3LYP-D3BJ enthalpy in solution:    | -1050.752621 a.u.                   |
| B3LYP-D3BJ free energy in solution: | -1050.837888 a.u.                   |
| Three lowest frequencies (cm-1):    | -284.9835      19.1162      29.4750 |
| Imaginary frequency:                | -284.9835 cm-1                      |

#### Cartesian coordinates

| ATOM | X         | Y         | Z         |
|------|-----------|-----------|-----------|
| C    | -1.589903 | -1.367648 | -0.771632 |
| C    | -0.823742 | -0.788974 | -1.791082 |
| C    | 0.457463  | -1.309098 | -2.192711 |
| H    | -1.182031 | 0.109292  | -2.301360 |
| C    | 2.539652  | -2.182325 | -0.062218 |
| C    | 2.799284  | -3.172376 | 1.059399  |

|    |           |           |           |
|----|-----------|-----------|-----------|
| H  | 3.795285  | -2.978081 | 1.481304  |
| H  | 2.802379  | -4.188076 | 0.630605  |
| H  | 2.030453  | -3.138256 | 1.844263  |
| C  | 1.882777  | 1.666467  | -0.275449 |
| C  | 1.929859  | 1.115501  | 1.057489  |
| C  | 0.593607  | 1.253670  | 1.626176  |
| C  | -0.241114 | 1.948712  | 0.669620  |
| C  | 0.537383  | 2.175452  | -0.508047 |
| C  | 3.160610  | 0.636117  | 1.762470  |
| H  | 3.687366  | 1.494179  | 2.214562  |
| H  | 3.856199  | 0.142262  | 1.069695  |
| H  | 2.922079  | -0.067047 | 2.572126  |
| C  | 3.048166  | 1.756442  | -1.208943 |
| H  | 3.726846  | 2.562885  | -0.881209 |
| H  | 2.734525  | 1.985476  | -2.236142 |
| H  | 3.615462  | 0.814084  | -1.221942 |
| C  | 0.092175  | 2.902754  | -1.740246 |
| H  | 0.378219  | 3.966289  | -1.671548 |
| H  | -0.998158 | 2.866591  | -1.868565 |
| H  | 0.561426  | 2.500702  | -2.649185 |
| C  | -1.654428 | 2.378189  | 0.905748  |
| H  | -1.666980 | 3.344545  | 1.438942  |
| H  | -2.206491 | 1.653696  | 1.520001  |
| H  | -2.207955 | 2.511295  | -0.033027 |
| C  | 0.195633  | 0.884727  | 3.021303  |
| H  | 0.382484  | 1.736010  | 3.699169  |
| H  | 0.772051  | 0.028811  | 3.397551  |
| H  | -0.872260 | 0.635983  | 3.087761  |
| H  | -1.224699 | -2.305229 | -0.348099 |
| O  | 3.410933  | -1.770576 | -0.812567 |
| N  | 1.203339  | -1.859973 | -0.208490 |
| H  | 0.624172  | -2.382709 | -2.241000 |
| H  | 1.073304  | -0.717594 | -2.874086 |
| Ir | 0.522807  | -0.071262 | -0.124926 |
| C  | -2.926159 | -0.955852 | -0.351646 |
| C  | -3.669303 | 0.048865  | -1.011078 |
| C  | -3.525268 | -1.629126 | 0.735965  |
| C  | -4.959865 | 0.366148  | -0.593722 |
| H  | -3.250264 | 0.569148  | -1.875272 |
| C  | -4.813937 | -1.304611 | 1.156543  |
| H  | -2.968942 | -2.419054 | 1.247604  |
| C  | -5.534763 | -0.305313 | 0.493365  |
| H  | -5.528756 | 1.133894  | -1.123259 |
| H  | -5.263081 | -1.838311 | 1.997117  |
| H  | -6.548389 | -0.055555 | 0.815437  |

TS3c

B3LYP SCF energy: -1164.39427881 a.u.  
 B3LYP enthalpy: -1163.906529 a.u.

B3LYP free energy: -1163.996927 a.u.  
 B3LYP-D3BJ SCF energy in solution: -1165.79252721 a.u.  
 B3LYP-D3BJ enthalpy in solution: -1165.304777 a.u.  
 B3LYP-D3BJ free energy in solution: -1165.395175 a.u.  
 Three lowest frequencies (cm-1): -127.1027 20.6486 31.2230  
 Imaginary frequency: -127.1027 cm-1

Cartesian coordinates

| ATOM | X         | Y         | Z         |
|------|-----------|-----------|-----------|
| C    | -0.967822 | -0.508968 | -2.501516 |
| C    | 0.216861  | -0.877371 | -1.821940 |
| C    | 1.363918  | 0.015991  | -1.753388 |
| H    | 0.367748  | -1.914385 | -1.510698 |
| C    | 0.323147  | 2.484737  | 0.169078  |
| C    | -0.051164 | 3.899775  | -0.234211 |
| H    | -0.042396 | 4.541503  | 0.657690  |
| H    | 0.701464  | 4.283536  | -0.942791 |
| H    | -1.029756 | 3.943178  | -0.734380 |
| C    | -1.532794 | -0.614393 | 1.760031  |
| C    | -2.374894 | 0.509971  | 1.446459  |
| C    | -3.309349 | 0.075378  | 0.407545  |
| C    | -3.050255 | -1.313157 | 0.116102  |
| C    | -1.941906 | -1.728459 | 0.920354  |
| C    | -2.410643 | 1.815265  | 2.182491  |
| H    | -3.106075 | 1.750768  | 3.036896  |
| H    | -1.419327 | 2.081366  | 2.573757  |
| H    | -2.754620 | 2.637319  | 1.539152  |
| C    | -0.465215 | -0.627906 | 2.809776  |
| H    | -0.922414 | -0.701954 | 3.811894  |
| H    | 0.212394  | -1.484135 | 2.692108  |
| H    | 0.137318  | 0.291764  | 2.773214  |
| C    | -1.361271 | -3.109068 | 0.972167  |
| H    | -1.863224 | -3.699436 | 1.758137  |
| H    | -1.494366 | -3.649670 | 0.024754  |
| H    | -0.289136 | -3.095232 | 1.214290  |
| C    | -3.842484 | -2.174632 | -0.820935 |
| H    | -4.672308 | -2.661779 | -0.280802 |
| H    | -4.284075 | -1.589927 | -1.639895 |
| H    | -3.231492 | -2.973619 | -1.264615 |
| C    | -4.437634 | 0.891896  | -0.139955 |
| H    | -5.339149 | 0.745766  | 0.481053  |
| H    | -4.204553 | 1.965275  | -0.134372 |
| H    | -4.693394 | 0.601771  | -1.168311 |
| H    | -0.980717 | 0.395676  | -3.113453 |
| O    | 1.020453  | 2.232184  | 1.143831  |
| N    | -0.090306 | 1.504575  | -0.705275 |
| Ir   | -1.223971 | 0.034481  | -0.368244 |
| H    | -1.688469 | -1.279283 | -2.784516 |
| H    | 1.387357  | 0.832196  | -2.474477 |
| C    | 2.572859  | -0.226174 | -1.050019 |
| C    | 3.671709  | 0.649428  | -1.261996 |



|   |          |           |           |
|---|----------|-----------|-----------|
| C | 2.756995 | -1.310225 | -0.140931 |
| C | 4.889911 | 0.462260  | -0.632519 |
| H | 3.551093 | 1.493184  | -1.946105 |
| C | 3.960903 | -1.507773 | 0.492267  |
| H | 1.932706 | -1.994968 | 0.064287  |
| C | 5.049777 | -0.625142 | 0.256416  |
| H | 5.709773 | 1.153018  | -0.825630 |
| H | 4.116877 | -2.335097 | 1.186564  |
| O | 6.168233 | -0.903167 | 0.913608  |
| C | 7.331206 | -0.091911 | 0.762360  |
| H | 7.136790 | 0.941831  | 1.090359  |
| H | 8.097864 | -0.540594 | 1.404735  |
| H | 7.681330 | -0.094426 | -0.282458 |

TS4c

|                                     |                                     |
|-------------------------------------|-------------------------------------|
| B3LYP SCF energy:                   | -1164.38159092 a.u.                 |
| B3LYP enthalpy:                     | -1163.894032 a.u.                   |
| B3LYP free energy:                  | -1163.986950 a.u.                   |
| B3LYP-D3BJ SCF energy in solution:  | -1165.78543143 a.u.                 |
| B3LYP-D3BJ enthalpy in solution:    | -1165.297873 a.u.                   |
| B3LYP-D3BJ free energy in solution: | -1165.390791 a.u.                   |
| Three lowest frequencies (cm-1):    | -299.0809      10.0682      22.0947 |
| Imaginary frequency:                | -299.0809 cm-1                      |

Cartesian coordinates

| ATOM | X         | Y         | Z         |
|------|-----------|-----------|-----------|
| C    | -1.271607 | -1.272056 | -0.964359 |
| C    | -0.348530 | -0.671369 | -1.828896 |
| C    | 0.919780  | -1.270502 | -2.163378 |
| H    | -0.601823 | 0.268123  | -2.327740 |
| C    | 2.762543  | -2.413689 | 0.022877  |
| C    | 2.841365  | -3.418678 | 1.159408  |
| H    | 3.848458  | -3.380469 | 1.597500  |
| H    | 2.688406  | -4.428073 | 0.743224  |
| H    | 2.075423  | -3.250286 | 1.929783  |
| C    | 2.499612  | 1.583662  | -0.230804 |
| C    | 2.509639  | 1.012355  | 1.098991  |
| C    | 1.188128  | 1.236503  | 1.666866  |
| C    | 0.401126  | 1.993056  | 0.715939  |
| C    | 1.197282  | 2.191710  | -0.455535 |
| C    | 3.703662  | 0.436804  | 1.794721  |
| H    | 4.313665  | 1.250182  | 2.224304  |
| H    | 4.340066  | -0.131031 | 1.101779  |
| H    | 3.414888  | -0.229309 | 2.619208  |
| C    | 3.671755  | 1.613034  | -1.160123 |
| H    | 4.366480  | 2.415983  | -0.857667 |
| H    | 3.369338  | 1.812506  | -2.197066 |
| H    | 4.221609  | 0.661012  | -1.137708 |
| C    | 0.803117  | 2.963939  | -1.678240 |

|    |           |           |           |
|----|-----------|-----------|-----------|
| H  | 1.155228  | 4.006481  | -1.596740 |
| H  | -0.287139 | 2.998407  | -1.809277 |
| H  | 1.246558  | 2.543522  | -2.592034 |
| C  | -0.989038 | 2.494399  | 0.952837  |
| H  | -0.958190 | 3.442921  | 1.516412  |
| H  | -1.584913 | 1.780527  | 1.538660  |
| H  | -1.524220 | 2.686485  | 0.013452  |
| C  | 0.759408  | 0.870388  | 3.053749  |
| H  | 0.993766  | 1.696713  | 3.747477  |
| H  | 1.279166  | -0.026320 | 3.417334  |
| H  | -0.322213 | 0.686499  | 3.109899  |
| H  | -0.976360 | -2.228971 | -0.527573 |
| O  | 3.708905  | -2.143204 | -0.700094 |
| N  | 1.495117  | -1.900386 | -0.173637 |
| H  | 1.009554  | -2.350567 | -2.252299 |
| H  | 1.611468  | -0.708977 | -2.795774 |
| Ir | 1.034068  | -0.049448 | -0.104464 |
| C  | -2.605627 | -0.819508 | -0.657731 |
| C  | -3.208884 | 0.323457  | -1.249113 |
| C  | -3.387573 | -1.574496 | 0.247364  |
| C  | -4.509144 | 0.679847  | -0.952302 |
| H  | -2.652918 | 0.927964  | -1.968848 |
| C  | -4.697149 | -1.227735 | 0.556712  |
| H  | -2.951359 | -2.462273 | 0.712947  |
| C  | -5.275564 | -0.090527 | -0.043595 |
| H  | -4.982845 | 1.548377  | -1.413422 |
| H  | -5.264737 | -1.843241 | 1.254104  |
| O  | -6.522266 | 0.333671  | 0.174309  |
| C  | -7.386347 | -0.381150 | 1.048447  |
| H  | -6.983115 | -0.409940 | 2.074476  |
| H  | -8.338305 | 0.163227  | 1.048962  |
| H  | -7.555801 | -1.409712 | 0.689097  |

TS3d

|                                     |                     |         |         |
|-------------------------------------|---------------------|---------|---------|
| B3LYP SCF energy:                   | -1386.72549893 a.u. |         |         |
| B3LYP enthalpy:                     | -1386.264584 a.u.   |         |         |
| B3LYP free energy:                  | -1386.358991 a.u.   |         |         |
| B3LYP-D3BJ SCF energy in solution:  | -1388.40634429 a.u. |         |         |
| B3LYP-D3BJ enthalpy in solution:    | -1387.945429 a.u.   |         |         |
| B3LYP-D3BJ free energy in solution: | -1388.039836 a.u.   |         |         |
| Three lowest frequencies (cm-1):    | -161.3632           | 16.5391 | 19.2908 |
| Imaginary frequency:                | -161.3632 cm-1      |         |         |

Cartesian coordinates

| ATOM | X         | Y         | Z         |
|------|-----------|-----------|-----------|
| C    | -1.603745 | -0.178677 | -2.583041 |
| C    | -0.324464 | -0.549761 | -2.109071 |
| C    | 0.725466  | 0.418579  | -1.903760 |
| H    | -0.081083 | -1.606699 | -1.971163 |

|    |           |           |           |
|----|-----------|-----------|-----------|
| C  | -0.350962 | 2.638119  | 0.257641  |
| C  | -1.025800 | 3.993673  | 0.163453  |
| H  | -1.033398 | 4.457197  | 1.160070  |
| H  | -0.433254 | 4.638312  | -0.506643 |
| H  | -2.044713 | 3.931632  | -0.244841 |
| C  | -1.512275 | -0.834158 | 1.709380  |
| C  | -2.528576 | 0.179053  | 1.629792  |
| C  | -3.526240 | -0.283161 | 0.661277  |
| C  | -3.134663 | -1.596250 | 0.196740  |
| C  | -1.887932 | -1.919003 | 0.813474  |
| C  | -2.632868 | 1.392350  | 2.502757  |
| H  | -3.171969 | 1.140741  | 3.432126  |
| H  | -1.641070 | 1.772692  | 2.782966  |
| H  | -3.186213 | 2.204606  | 2.011572  |
| C  | -0.309870 | -0.787626 | 2.598262  |
| H  | -0.591503 | -1.063289 | 3.629543  |
| H  | 0.469667  | -1.487708 | 2.269056  |
| H  | 0.126599  | 0.221528  | 2.618476  |
| C  | -1.130445 | -3.200556 | 0.649898  |
| H  | -1.436716 | -3.916270 | 1.432355  |
| H  | -1.326034 | -3.677613 | -0.320321 |
| H  | -0.046275 | -3.054712 | 0.755831  |
| C  | -3.929828 | -2.472693 | -0.722902 |
| H  | -4.636893 | -3.089491 | -0.142058 |
| H  | -4.521329 | -1.885562 | -1.439025 |
| H  | -3.290249 | -3.161600 | -1.292348 |
| C  | -4.814411 | 0.408616  | 0.344473  |
| H  | -5.592940 | 0.087983  | 1.059154  |
| H  | -4.722467 | 1.500197  | 0.424105  |
| H  | -5.171762 | 0.166569  | -0.665608 |
| H  | -1.755326 | 0.808595  | -3.023490 |
| O  | 0.563614  | 2.396363  | 1.034624  |
| N  | -0.769050 | 1.718703  | -0.679887 |
| Ir | -1.606133 | 0.044961  | -0.362135 |
| H  | -2.296398 | -0.957715 | -2.908439 |
| H  | 0.641926  | 1.354896  | -2.451153 |
| C  | 2.007943  | 0.167844  | -1.291038 |
| C  | 2.952167  | 1.219887  | -1.269802 |
| C  | 2.374135  | -1.081150 | -0.732562 |
| C  | 4.214843  | 1.036303  | -0.714822 |
| H  | 2.684299  | 2.190844  | -1.691881 |
| C  | 3.635567  | -1.267374 | -0.187249 |
| H  | 1.670492  | -1.914729 | -0.737340 |
| C  | 4.556737  | -0.206123 | -0.171209 |
| H  | 4.938178  | 1.852764  | -0.706273 |
| H  | 3.921427  | -2.237740 | 0.222511  |
| C  | 5.911989  | -0.411020 | 0.479918  |
| F  | 6.378694  | -1.644453 | 0.240205  |
| F  | 5.818264  | -0.264831 | 1.810207  |
| F  | 6.811167  | 0.471456  | 0.031788  |

TS4d

B3LYP SCF energy: -1386.71921118 a.u.  
B3LYP enthalpy: -1386.258178 a.u.  
B3LYP free energy: -1386.352070 a.u.  
B3LYP-D3BJ SCF energy in solution: -1388.40462293 a.u.  
B3LYP-D3BJ enthalpy in solution: -1387.943590 a.u.  
B3LYP-D3BJ free energy in solution: -1388.037482 a.u.  
Three lowest frequencies (cm-1): -274.1861 19.9391 20.8064  
Imaginary frequency: -274.1861 cm-1

Cartesian coordinates

| ATOM | X         | Y         | Z         |
|------|-----------|-----------|-----------|
| C    | -0.598571 | -1.425458 | -0.971496 |
| C    | 0.240150  | -0.837799 | -1.927641 |
| C    | 1.571573  | -1.320467 | -2.185129 |
| H    | -0.092696 | 0.041742  | -2.486217 |
| C    | 3.442142  | -2.119071 | 0.156816  |
| C    | 3.626438  | -3.078094 | 1.318878  |
| H    | 4.574906  | -2.845425 | 1.822980  |
| H    | 3.695633  | -4.102072 | 0.916256  |
| H    | 2.789937  | -3.049855 | 2.031674  |
| C    | 2.664842  | 1.712932  | -0.193870 |
| C    | 2.637581  | 1.168676  | 1.143042  |
| C    | 1.260386  | 1.258953  | 1.615378  |
| C    | 0.470150  | 1.915393  | 0.595704  |
| C    | 1.321391  | 2.168686  | -0.525060 |
| C    | 3.832550  | 0.743629  | 1.937956  |
| H    | 4.280450  | 1.622766  | 2.432425  |
| H    | 4.601217  | 0.288746  | 1.298091  |
| H    | 3.567029  | 0.023371  | 2.723874  |
| C    | 3.889590  | 1.840741  | -1.042842 |
| H    | 4.516068  | 2.670152  | -0.671658 |
| H    | 3.642060  | 2.056845  | -2.090624 |
| H    | 4.487809  | 0.918183  | -1.009538 |
| C    | 0.936747  | 2.878183  | -1.787795 |
| H    | 1.173473  | 3.952357  | -1.699607 |
| H    | -0.139322 | 2.798844  | -1.993662 |
| H    | 1.486245  | 2.498459  | -2.660791 |
| C    | -0.969583 | 2.297253  | 0.728052  |
| H    | -1.048643 | 3.286092  | 1.211994  |
| H    | -1.529696 | 1.582045  | 1.345458  |
| H    | -1.470047 | 2.365090  | -0.246458 |
| C    | 0.779913  | 0.883055  | 2.981963  |
| H    | 0.876771  | 1.748845  | 3.660272  |
| H    | 1.367696  | 0.059908  | 3.409859  |
| H    | -0.276905 | 0.583796  | 2.975071  |
| H    | -0.257561 | -2.356080 | -0.514186 |
| O    | 4.363680  | -1.692795 | -0.521652 |
| N    | 2.116001  | -1.841431 | -0.118376 |

|    |           |           |           |
|----|-----------|-----------|-----------|
| H  | 1.776094  | -2.388757 | -2.197718 |
| H  | 2.242324  | -0.715209 | -2.799356 |
| Ir | 1.367393  | -0.078374 | -0.128633 |
| C  | -1.980863 | -1.041116 | -0.681541 |
| C  | -2.687015 | -0.070966 | -1.424543 |
| C  | -2.657566 | -1.703985 | 0.364428  |
| C  | -4.011621 | 0.232766  | -1.123182 |
| H  | -2.212761 | 0.436372  | -2.267265 |
| C  | -3.980428 | -1.396927 | 0.672489  |
| H  | -2.136016 | -2.473845 | 0.938690  |
| C  | -4.659252 | -0.420426 | -0.066112 |
| H  | -4.553890 | 0.970452  | -1.717321 |
| H  | -4.493127 | -1.923251 | 1.479574  |
| C  | -6.076487 | -0.037314 | 0.305985  |
| F  | -6.072712 | 0.947958  | 1.221685  |
| F  | -6.743078 | -1.072620 | 0.831902  |
| F  | -6.760898 | 0.405299  | -0.757374 |

### TS3e

|                                     |                     |         |         |
|-------------------------------------|---------------------|---------|---------|
| B3LYP SCF energy:                   | -1125.32846202 a.u. |         |         |
| B3LYP enthalpy:                     | -1124.855631 a.u.   |         |         |
| B3LYP free energy:                  | -1124.946931 a.u.   |         |         |
| B3LYP-D3BJ SCF energy in solution:  | -1126.69372383 a.u. |         |         |
| B3LYP-D3BJ enthalpy in solution:    | -1126.220893 a.u.   |         |         |
| B3LYP-D3BJ free energy in solution: | -1126.312193 a.u.   |         |         |
| Three lowest frequencies (cm-1):    | -165.9816           | 20.0554 | 23.5316 |
| Imaginary frequency:                | -165.9816 cm-1      |         |         |

### Cartesian coordinates

| ATOM | X         | Y         | Z         |
|------|-----------|-----------|-----------|
| C    | 0.088509  | -0.752677 | -2.292252 |
| C    | 0.843954  | -1.196781 | -1.183288 |
| C    | 1.746795  | -0.328554 | -0.483595 |
| H    | 0.729651  | -2.217105 | -0.801010 |
| C    | 0.496100  | 2.520377  | 0.276451  |
| C    | 0.172928  | 3.887744  | -0.289795 |
| H    | 1.105018  | 4.338218  | -0.668730 |
| H    | -0.546412 | 3.843800  | -1.119975 |
| H    | -0.205840 | 4.527696  | 0.519921  |
| C    | -1.842326 | -0.311645 | 1.630720  |
| C    | -2.525093 | 0.694549  | 0.868886  |
| C    | -3.042632 | 0.049853  | -0.342735 |
| C    | -2.714952 | -1.358557 | -0.279899 |
| C    | -1.945434 | -1.571158 | 0.905451  |
| C    | -2.788695 | 2.102754  | 1.305818  |
| H    | -3.711129 | 2.141028  | 1.910143  |
| H    | -1.968357 | 2.493598  | 1.923659  |
| H    | -2.927779 | 2.777297  | 0.449978  |
| C    | -1.190199 | -0.105430 | 2.960861  |

|    |           |           |           |
|----|-----------|-----------|-----------|
| H  | -1.958108 | -0.080234 | 3.753625  |
| H  | -0.492079 | -0.917119 | 3.205114  |
| H  | -0.636543 | 0.843890  | 2.991600  |
| C  | -1.415720 | -2.885797 | 1.390120  |
| H  | -2.109103 | -3.313714 | 2.134364  |
| H  | -1.319216 | -3.617324 | 0.576583  |
| H  | -0.438212 | -2.783160 | 1.882561  |
| C  | -3.154360 | -2.403953 | -1.259515 |
| H  | -4.113349 | -2.843279 | -0.935603 |
| H  | -3.310099 | -1.984958 | -2.262962 |
| H  | -2.430799 | -3.227236 | -1.341273 |
| C  | -3.917114 | 0.701362  | -1.367926 |
| H  | -4.975004 | 0.616738  | -1.063110 |
| H  | -3.688585 | 1.769860  | -1.479454 |
| H  | -3.816023 | 0.225778  | -2.352940 |
| H  | 0.403024  | 0.132843  | -2.846887 |
| O  | 0.973503  | 2.349088  | 1.393987  |
| N  | 0.321661  | 1.476842  | -0.599996 |
| Ir | -0.856805 | -0.010422 | -0.388561 |
| H  | -0.529431 | -1.470231 | -2.836357 |
| H  | 2.256052  | 0.449250  | -1.049386 |
| C  | 2.330311  | -0.644867 | 0.844492  |
| H  | 1.828855  | -1.479439 | 1.351914  |
| H  | 2.226106  | 0.260115  | 1.473071  |
| C  | 3.834403  | -0.963385 | 0.798489  |
| O  | 4.344147  | -1.783788 | 1.510708  |
| O  | 4.470923  | -0.200181 | -0.091166 |
| C  | 5.915290  | -0.349505 | -0.179636 |
| C  | 6.421271  | 0.596116  | -1.245138 |
| H  | 6.137971  | -1.402763 | -0.409762 |
| H  | 6.341605  | -0.130246 | 0.811297  |
| H  | 7.515028  | 0.505072  | -1.327298 |
| H  | 5.984963  | 0.361367  | -2.228171 |
| H  | 6.183377  | 1.641223  | -0.995033 |

TS4e

|                                     |                                     |
|-------------------------------------|-------------------------------------|
| B3LYP SCF energy:                   | -1125.31971953 a.u.                 |
| B3LYP enthalpy:                     | -1124.846638 a.u.                   |
| B3LYP free energy:                  | -1124.938745 a.u.                   |
| B3LYP-D3BJ SCF energy in solution:  | -1126.69007633 a.u.                 |
| B3LYP-D3BJ enthalpy in solution:    | -1126.216995 a.u.                   |
| B3LYP-D3BJ free energy in solution: | -1126.309102 a.u.                   |
| Three lowest frequencies (cm-1):    | -276.4116      14.6592      19.6285 |
| Imaginary frequency:                | -276.4116 cm-1                      |

Cartesian coordinates

| ATOM | X         | Y        | Z         |
|------|-----------|----------|-----------|
| C    | -1.677159 | 0.342215 | -0.471319 |
| C    | -1.341823 | 0.505423 | 0.879664  |

|    |           |           |           |
|----|-----------|-----------|-----------|
| C  | -0.583042 | 1.635491  | 1.345310  |
| H  | -1.586939 | -0.282388 | 1.600127  |
| C  | 1.769422  | 2.723773  | -0.372777 |
| C  | 2.126643  | 3.388068  | -1.689933 |
| H  | 1.746302  | 2.840458  | -2.563749 |
| H  | 3.218715  | 3.499690  | -1.745332 |
| H  | 1.680775  | 4.396282  | -1.698568 |
| C  | 2.382450  | -0.797170 | 1.129416  |
| C  | 2.718353  | -0.661432 | -0.261748 |
| C  | 1.812314  | -1.528182 | -1.014090 |
| C  | 0.973945  | -2.236003 | -0.070727 |
| C  | 1.292112  | -1.759097 | 1.239079  |
| C  | 3.881836  | 0.103820  | -0.811559 |
| H  | 4.784936  | -0.530124 | -0.790524 |
| H  | 4.090832  | 1.003354  | -0.216270 |
| H  | 3.718526  | 0.407645  | -1.854618 |
| C  | 3.081462  | -0.106169 | 2.256991  |
| H  | 4.061687  | -0.581700 | 2.434165  |
| H  | 2.510800  | -0.167765 | 3.193025  |
| H  | 3.250982  | 0.955400  | 2.024073  |
| C  | 0.698148  | -2.242137 | 2.527137  |
| H  | 1.336420  | -3.031649 | 2.959500  |
| H  | -0.301909 | -2.673488 | 2.384748  |
| H  | 0.626044  | -1.439849 | 3.275058  |
| C  | 0.008071  | -3.325654 | -0.417140 |
| H  | 0.543192  | -4.289355 | -0.472783 |
| H  | -0.467199 | -3.161324 | -1.393673 |
| H  | -0.782103 | -3.437696 | 0.337781  |
| C  | 1.871962  | -1.776173 | -2.489006 |
| H  | 2.604937  | -2.574216 | -2.701592 |
| H  | 2.188191  | -0.881118 | -3.041707 |
| H  | 0.902763  | -2.102037 | -2.890335 |
| H  | -1.601898 | 1.215394  | -1.122921 |
| O  | 2.348954  | 2.947566  | 0.678431  |
| N  | 0.656104  | 1.909266  | -0.458368 |
| H  | -0.803190 | 2.637027  | 0.981761  |
| H  | -0.117645 | 1.590721  | 2.333096  |
| Ir | 0.648207  | 0.043698  | -0.010288 |
| C  | -2.524209 | -0.790598 | -0.970579 |
| H  | -2.418226 | -1.676751 | -0.324486 |
| H  | -2.249983 | -1.079946 | -1.993479 |
| C  | -4.021943 | -0.448693 | -1.011957 |
| O  | -4.408097 | 0.172911  | 0.108385  |
| O  | -4.745727 | -0.738224 | -1.925826 |
| C  | -5.815623 | 0.510836  | 0.219169  |
| C  | -6.026246 | 1.230860  | 1.532247  |
| H  | -6.399594 | -0.420475 | 0.154743  |
| H  | -6.091801 | 1.130358  | -0.647978 |
| H  | -7.088848 | 1.495938  | 1.641433  |
| H  | -5.744339 | 0.595088  | 2.385651  |
| H  | -5.437194 | 2.159846  | 1.576633  |

TS3f

B3LYP SCF energy: -1791.30805997 a.u.  
B3LYP enthalpy: -1790.747714 a.u.  
B3LYP free energy: -1790.855508 a.u.  
B3LYP-D3BJ SCF energy in solution: -1793.19764722 a.u.  
B3LYP-D3BJ enthalpy in solution: -1792.637301 a.u.  
B3LYP-D3BJ free energy in solution: -1792.745095 a.u.  
Three lowest frequencies (cm-1): -99.0525 9.6166 15.2584  
Imaginary frequency: -99.0525 cm-1

Cartesian coordinates

| ATOM | X         | Y         | Z         |
|------|-----------|-----------|-----------|
| C    | 0.944935  | 0.767242  | -2.414931 |
| C    | 0.816214  | 1.766328  | -1.419898 |
| C    | -0.314019 | 1.809415  | -0.548120 |
| H    | 1.606490  | 2.509478  | -1.269070 |
| C    | 3.098528  | 0.423308  | 1.059153  |
| C    | 2.617631  | -0.908273 | 1.388301  |
| C    | 2.867552  | -1.743639 | 0.246063  |
| C    | 3.524455  | -0.932676 | -0.775776 |
| C    | 3.699442  | 0.390955  | -0.253515 |
| C    | 2.107492  | -1.341526 | 2.725182  |
| H    | 2.964268  | -1.545150 | 3.391475  |
| H    | 1.487595  | -0.565994 | 3.195172  |
| H    | 1.497733  | -2.249159 | 2.649434  |
| C    | 3.101591  | 1.581293  | 2.005712  |
| H    | 3.982151  | 1.512994  | 2.668361  |
| H    | 3.162216  | 2.546677  | 1.484811  |
| H    | 2.210957  | 1.581954  | 2.649154  |
| C    | 4.440710  | 1.514575  | -0.914888 |
| H    | 5.511510  | 1.466370  | -0.653766 |
| H    | 4.373338  | 1.466919  | -2.010770 |
| H    | 4.076335  | 2.499953  | -0.591335 |
| C    | 4.052089  | -1.453097 | -2.076803 |
| H    | 5.037405  | -1.923976 | -1.916136 |
| H    | 3.389993  | -2.214456 | -2.511301 |
| H    | 4.187115  | -0.652441 | -2.816296 |
| C    | 2.620005  | -3.214298 | 0.154837  |
| H    | 3.474108  | -3.750492 | 0.605321  |
| H    | 1.705418  | -3.500487 | 0.688751  |
| H    | 2.532983  | -3.547079 | -0.888161 |
| H    | 0.064275  | 0.223128  | -2.759965 |
| N    | -0.388545 | -0.574748 | -0.394667 |
| H    | -1.259698 | 1.416836  | -0.916391 |
| Ir   | 1.470485  | -0.105199 | -0.417487 |
| S    | -1.075769 | -1.383989 | 0.923173  |
| O    | -1.157915 | -0.361376 | 1.989068  |
| O    | -0.369221 | -2.649860 | 1.188301  |



|   |           |           |           |
|---|-----------|-----------|-----------|
| C | -2.724418 | -1.775474 | 0.377412  |
| C | -2.997709 | -3.058366 | -0.104631 |
| C | -3.726647 | -0.800848 | 0.456652  |
| C | -4.295164 | -3.361086 | -0.520119 |
| H | -2.207533 | -3.809799 | -0.138173 |
| C | -5.014556 | -1.124458 | 0.036401  |
| H | -3.503692 | 0.190198  | 0.855911  |
| C | -5.323674 | -2.406354 | -0.457013 |
| H | -4.514296 | -4.364343 | -0.894270 |
| H | -5.803424 | -0.370197 | 0.101722  |
| C | -6.730755 | -2.748693 | -0.872174 |
| H | -6.760231 | -3.638669 | -1.516859 |
| H | -7.206705 | -1.914366 | -1.409876 |
| H | -7.354716 | -2.960360 | 0.013385  |
| C | -0.381190 | 2.597311  | 0.703192  |
| H | -0.740285 | 1.911491  | 1.497577  |
| H | 0.586622  | 3.012496  | 1.010859  |
| C | -1.399078 | 3.748902  | 0.655400  |
| O | -1.195506 | 4.816713  | 1.162680  |
| O | -2.516093 | 3.390569  | 0.016864  |
| C | -3.581697 | 4.378178  | -0.053305 |
| C | -4.681789 | 3.823454  | -0.929454 |
| H | -3.158713 | 5.313187  | -0.450707 |
| H | -3.925977 | 4.581019  | 0.972711  |
| H | -5.503330 | 4.553099  | -0.993233 |
| H | -4.318810 | 3.627980  | -1.950101 |
| H | -5.088307 | 2.887388  | -0.516803 |
| H | 1.790181  | 0.811793  | -3.104427 |

TS4f

|                                     |                                     |
|-------------------------------------|-------------------------------------|
| B3LYP SCF energy:                   | -1791.30065414 a.u.                 |
| B3LYP enthalpy:                     | -1790.739852 a.u.                   |
| B3LYP free energy:                  | -1790.847427 a.u.                   |
| B3LYP-D3BJ SCF energy in solution:  | -1793.19140405 a.u.                 |
| B3LYP-D3BJ enthalpy in solution:    | -1792.630602 a.u.                   |
| B3LYP-D3BJ free energy in solution: | -1792.738177 a.u.                   |
| Three lowest frequencies (cm-1):    | -238.4760      11.5480      14.3055 |
| Imaginary frequency:                | -238.4760 cm-1                      |

Cartesian coordinates

| ATOM | X         | Y         | Z         |
|------|-----------|-----------|-----------|
| C    | 1.454347  | 1.266812  | -0.129543 |
| C    | 1.128885  | 0.776006  | -1.401329 |
| C    | -0.230373 | 0.657774  | -1.842628 |
| H    | 1.918252  | 0.405784  | -2.063149 |
| C    | 0.345138  | -3.102689 | -0.678817 |
| C    | 0.137461  | -2.960746 | 0.737518  |
| C    | 1.357986  | -2.385902 | 1.293415  |
| C    | 2.337253  | -2.279673 | 0.227889  |

|    |           |           |           |
|----|-----------|-----------|-----------|
| C  | 1.703439  | -2.673685 | -0.985893 |
| C  | -1.014739 | -3.497819 | 1.525690  |
| H  | -0.758850 | -4.512130 | 1.879237  |
| H  | -1.925652 | -3.558697 | 0.918589  |
| H  | -1.245010 | -2.872849 | 2.397608  |
| C  | -0.635849 | -3.687342 | -1.642343 |
| H  | -0.610814 | -4.788916 | -1.569633 |
| H  | -0.400784 | -3.420511 | -2.681632 |
| H  | -1.656274 | -3.351666 | -1.412417 |
| C  | 2.339775  | -2.741398 | -2.340940 |
| H  | 2.696297  | -3.767274 | -2.536306 |
| H  | 3.207720  | -2.073298 | -2.425245 |
| H  | 1.630566  | -2.489251 | -3.142229 |
| C  | 3.777844  | -1.913270 | 0.405012  |
| H  | 4.360709  | -2.825020 | 0.622891  |
| H  | 3.931744  | -1.224433 | 1.246271  |
| H  | 4.210939  | -1.463619 | -0.499427 |
| C  | 1.605864  | -2.139599 | 2.748214  |
| H  | 1.968441  | -3.065734 | 3.228051  |
| H  | 0.685374  | -1.834539 | 3.264283  |
| H  | 2.365006  | -1.361831 | 2.908150  |
| H  | 0.672880  | 1.792879  | 0.421495  |
| N  | -1.040996 | 0.175409  | 0.198668  |
| H  | -0.957894 | 1.434840  | -1.618621 |
| H  | -0.451390 | 0.029298  | -2.709486 |
| Ir | 0.495529  | -0.926158 | -0.090143 |
| C  | 2.867548  | 1.548397  | 0.283979  |
| H  | 3.558140  | 0.769161  | -0.073927 |
| H  | 2.971956  | 1.611992  | 1.375104  |
| C  | 3.352532  | 2.858613  | -0.356725 |
| O  | 3.054039  | 3.197453  | -1.475616 |
| O  | 4.157018  | 3.527493  | 0.461976  |
| C  | 4.741265  | 4.759291  | -0.038430 |
| C  | 5.585215  | 5.358632  | 1.063882  |
| H  | 3.922788  | 5.426095  | -0.351096 |
| H  | 5.331656  | 4.520609  | -0.937044 |
| H  | 6.041682  | 6.295850  | 0.710766  |
| H  | 4.975473  | 5.586773  | 1.951268  |
| H  | 6.393821  | 4.674427  | 1.362757  |
| S  | -2.569079 | -0.484210 | 0.576704  |
| O  | -2.901601 | -1.590377 | -0.337480 |
| O  | -2.476260 | -0.709168 | 2.029009  |
| C  | -3.695328 | 0.857136  | 0.266489  |
| C  | -3.828972 | 1.870074  | 1.224289  |
| C  | -4.444643 | 0.868338  | -0.913706 |
| C  | -4.719200 | 2.912283  | 0.978769  |
| H  | -3.254409 | 1.828429  | 2.151196  |
| C  | -5.330814 | 1.923010  | -1.138767 |
| H  | -4.347098 | 0.052656  | -1.632054 |
| C  | -5.484633 | 2.959333  | -0.202356 |
| H  | -4.831312 | 3.704485  | 1.723770  |

|   |           |          |           |
|---|-----------|----------|-----------|
| H | -5.922806 | 1.935217 | -2.057513 |
| C | -6.467743 | 4.077010 | -0.433264 |
| H | -6.063194 | 5.044864 | -0.099730 |
| H | -6.745720 | 4.163128 | -1.493407 |
| H | -7.394840 | 3.900180 | 0.139042  |

TS3g

|                                     |                     |         |         |
|-------------------------------------|---------------------|---------|---------|
| B3LYP SCF energy:                   | -2052.70624862 a.u. |         |         |
| B3LYP enthalpy:                     | -2052.157865 a.u.   |         |         |
| B3LYP free energy:                  | -2052.267775 a.u.   |         |         |
| B3LYP-D3BJ SCF energy in solution:  | -2054.91211109 a.u. |         |         |
| B3LYP-D3BJ enthalpy in solution:    | -2054.363727 a.u.   |         |         |
| B3LYP-D3BJ free energy in solution: | -2054.473637 a.u.   |         |         |
| Three lowest frequencies (cm-1):    | -102.8885           | 13.4358 | 16.8543 |
| Imaginary frequency:                | -102.8885 cm-1      |         |         |

Cartesian coordinates

| ATOM | X         | Y         | Z         |
|------|-----------|-----------|-----------|
| C    | -1.658085 | -0.224646 | -2.584390 |
| C    | -0.556302 | -0.991763 | -2.138326 |
| C    | 0.697887  | -0.385109 | -1.784229 |
| H    | -0.613449 | -2.083079 | -2.156577 |
| C    | -3.056256 | -2.269828 | 0.028760  |
| C    | -2.293292 | -1.880820 | 1.200874  |
| C    | -2.764398 | -0.584532 | 1.649090  |
| C    | -3.757206 | -0.146098 | 0.693140  |
| C    | -3.947007 | -1.205385 | -0.289364 |
| C    | -1.300899 | -2.727256 | 1.932682  |
| H    | -1.808192 | -3.281606 | 2.741990  |
| H    | -0.827101 | -3.469572 | 1.276089  |
| H    | -0.514311 | -2.113634 | 2.393509  |
| C    | -2.956735 | -3.586746 | -0.680811 |
| H    | -3.627334 | -4.323119 | -0.205693 |
| H    | -3.253414 | -3.512717 | -1.736409 |
| H    | -1.941000 | -4.004934 | -0.637100 |
| C    | -4.968919 | -1.187385 | -1.383577 |
| H    | -5.946669 | -1.505882 | -0.982756 |
| H    | -5.102019 | -0.181315 | -1.805014 |
| H    | -4.714227 | -1.873997 | -2.202470 |
| C    | -4.538889 | 1.124005  | 0.783978  |
| H    | -5.371458 | 0.991692  | 1.497689  |
| H    | -3.906500 | 1.947610  | 1.142858  |
| H    | -4.972071 | 1.408703  | -0.184262 |
| C    | -2.451762 | 0.056626  | 2.963899  |
| H    | -3.144143 | -0.339412 | 3.727704  |
| H    | -1.423178 | -0.151492 | 3.284128  |
| H    | -2.564969 | 1.146299  | 2.919393  |
| H    | -1.514636 | 0.822081  | -2.858383 |
| N    | -0.577862 | 1.091521  | -0.395474 |

|    |           |           |           |
|----|-----------|-----------|-----------|
| H  | 0.874990  | 0.625844  | -2.144464 |
| Ir | -1.808685 | -0.358564 | -0.362747 |
| S  | -0.265633 | 2.004138  | 0.994894  |
| O  | 0.449753  | 1.148566  | 1.957601  |
| O  | -1.535959 | 2.652558  | 1.377761  |
| C  | 0.854786  | 3.273438  | 0.432074  |
| C  | 0.351859  | 4.378042  | -0.265762 |
| C  | 2.216335  | 3.160623  | 0.723573  |
| C  | 1.236553  | 5.366199  | -0.691440 |
| H  | -0.719096 | 4.466898  | -0.456716 |
| C  | 3.085938  | 4.165282  | 0.291790  |
| H  | 2.578347  | 2.308214  | 1.300966  |
| C  | 2.615953  | 5.280261  | -0.421557 |
| H  | 0.848593  | 6.231674  | -1.235385 |
| H  | 4.150707  | 4.088364  | 0.527483  |
| C  | 3.550520  | 6.378034  | -0.859768 |
| H  | 4.603230  | 6.067695  | -0.796163 |
| H  | 3.427533  | 7.270046  | -0.221928 |
| H  | 3.343806  | 6.692705  | -1.894574 |
| H  | -2.503064 | -0.730726 | -3.055106 |
| C  | 1.841106  | -1.054724 | -1.218186 |
| C  | 3.037930  | -0.312705 | -1.071006 |
| C  | 1.837071  | -2.416333 | -0.827265 |
| C  | 4.185810  | -0.904838 | -0.556404 |
| H  | 3.055040  | 0.739589  | -1.363805 |
| C  | 2.983650  | -3.007662 | -0.316237 |
| H  | 0.933179  | -3.017733 | -0.932595 |
| C  | 4.158430  | -2.251382 | -0.173674 |
| H  | 5.106822  | -0.328794 | -0.454821 |
| H  | 2.981108  | -4.060715 | -0.030223 |
| C  | 5.392511  | -2.886193 | 0.441308  |
| F  | 6.512226  | -2.318848 | -0.022437 |
| F  | 5.446492  | -4.198176 | 0.177910  |
| F  | 5.378783  | -2.737394 | 1.774113  |

TS4g

|                                     |                                     |
|-------------------------------------|-------------------------------------|
| B3LYP SCF energy:                   | -2052.69859440 a.u.                 |
| B3LYP enthalpy:                     | -2052.150170 a.u.                   |
| B3LYP free energy:                  | -2052.259381 a.u.                   |
| B3LYP-D3BJ SCF energy in solution:  | -2054.90597624 a.u.                 |
| B3LYP-D3BJ enthalpy in solution:    | -2054.357552 a.u.                   |
| B3LYP-D3BJ free energy in solution: | -2054.466763 a.u.                   |
| Three lowest frequencies (cm-1):    | -248.3473      15.2445      20.4570 |
| Imaginary frequency:                | -248.3473 cm-1                      |

Cartesian coordinates

| ATOM | X        | Y        | Z         |
|------|----------|----------|-----------|
| C    | 0.916507 | 1.178880 | -0.843823 |
| C    | 0.364173 | 0.389247 | -1.859809 |

|    |           |           |           |
|----|-----------|-----------|-----------|
| C  | -1.047671 | 0.315891  | -2.105025 |
| H  | 1.013555  | -0.219275 | -2.496120 |
| C  | -0.638048 | -3.181630 | -0.392727 |
| C  | -0.765144 | -2.807776 | 0.998782  |
| C  | 0.521729  | -2.269509 | 1.409906  |
| C  | 1.453566  | -2.414902 | 0.305488  |
| C  | 0.739139  | -2.953181 | -0.804230 |
| C  | -1.920439 | -3.112650 | 1.896614  |
| H  | -1.740928 | -4.086122 | 2.386114  |
| H  | -2.861841 | -3.169691 | 1.337690  |
| H  | -2.048604 | -2.348008 | 2.672691  |
| C  | -1.723853 | -3.801134 | -1.211930 |
| H  | -1.820484 | -4.869757 | -0.951807 |
| H  | -1.513483 | -3.740905 | -2.288320 |
| H  | -2.688357 | -3.313695 | -1.009947 |
| C  | 1.310165  | -3.307168 | -2.143970 |
| H  | 1.575774  | -4.377938 | -2.166404 |
| H  | 2.226009  | -2.742121 | -2.365272 |
| H  | 0.591994  | -3.137441 | -2.958898 |
| C  | 2.913113  | -2.095655 | 0.362224  |
| H  | 3.466719  | -2.967966 | 0.750788  |
| H  | 3.123258  | -1.249595 | 1.030359  |
| H  | 3.325212  | -1.856823 | -0.626901 |
| C  | 0.857877  | -1.803237 | 2.791091  |
| H  | 1.190938  | -2.660836 | 3.401794  |
| H  | -0.016027 | -1.358272 | 3.285828  |
| H  | 1.669432  | -1.062893 | 2.786429  |
| H  | 0.228666  | 1.803742  | -0.271528 |
| N  | -1.647027 | 0.330307  | 0.050015  |
| H  | -1.677937 | 1.193581  | -1.983923 |
| H  | -1.421147 | -0.444054 | -2.795947 |
| Ir | -0.296735 | -0.997792 | -0.174374 |
| S  | -3.175492 | -0.056680 | 0.702909  |
| O  | -3.744199 | -1.220858 | 0.001498  |
| O  | -2.927815 | -0.101116 | 2.154454  |
| C  | -4.169018 | 1.370128  | 0.325826  |
| C  | -4.079609 | 2.500834  | 1.147215  |
| C  | -5.029410 | 1.337482  | -0.775282 |
| C  | -4.855977 | 3.615647  | 0.841314  |
| H  | -3.423099 | 2.495346  | 2.019052  |
| C  | -5.798727 | 2.466445  | -1.062899 |
| H  | -5.106417 | 0.434287  | -1.382932 |
| C  | -5.726483 | 3.621066  | -0.265756 |
| H  | -4.793671 | 4.500537  | 1.480395  |
| H  | -6.477162 | 2.445688  | -1.919609 |
| C  | -6.578190 | 4.827849  | -0.561640 |
| H  | -7.418299 | 4.893696  | 0.150910  |
| H  | -6.000789 | 5.760295  | -0.463980 |
| H  | -7.004263 | 4.788349  | -1.574147 |
| C  | 2.339067  | 1.390555  | -0.589012 |
| C  | 3.354833  | 0.961900  | -1.471675 |

|   |          |          |           |
|---|----------|----------|-----------|
| C | 2.716015 | 2.100450 | 0.571168  |
| C | 4.693327 | 1.222390 | -1.195541 |
| H | 3.100477 | 0.448266 | -2.401179 |
| C | 4.056151 | 2.352225 | 0.855184  |
| H | 1.942896 | 2.458368 | 1.255700  |
| C | 5.049279 | 1.907305 | -0.024942 |
| H | 5.468902 | 0.906457 | -1.895799 |
| H | 4.334010 | 2.905210 | 1.753925  |
| C | 6.513089 | 2.125103 | 0.297565  |
| F | 7.031118 | 1.037354 | 0.895080  |
| F | 6.688051 | 3.162908 | 1.124915  |
| F | 7.227902 | 2.350046 | -0.813449 |
